# Supplementary material for: Analysis of the global atmospheric background sulfur budget in a multi-model framework
Source: Copernicus journal article supplement (doi:10.5194/egusphere-2023-1655), 2023-08-28
Supplement: Supplementary file [file egusphere-2023-1655-RC1-supplement.pdf]

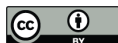

## Analysis of the global atmospheric background sulfur budget in a multi-model framework

Christina V. Brodowsky<sup>1,2</sup>, Timofei Sukhodolov<sup>2</sup>, Gabriel Chiodo<sup>1</sup>, Valentina Aquila<sup>3</sup>, Slimane Bekki<sup>4</sup>, Sandip S. Dhomse<sup>5,6</sup>, Anton Laakso<sup>7</sup>, Graham W. Mann<sup>5</sup>, Ulrike Niemeier<sup>8</sup>, Iaria Quaglia<sup>9</sup>, Eugene Rozanov<sup>2</sup>, Anja Schmidt<sup>10,11,12</sup>, Takashi Sekiya<sup>13</sup>, Simone Tilmes<sup>14</sup>, Claudia Timmreck<sup>8</sup>, Sandro Vattioni<sup>1</sup>, Daniele Visioni<sup>14,15</sup>, Pengfei Yu<sup>16</sup>, Yunqian Zhu<sup>17,18</sup>, and Thomas Peter<sup>1</sup>

<sup>1</sup>Institute for Atmospheric and Climate Science, ETH Zürich, Zürich, Switzerland

<sup>2</sup>Physikalisch-Meteorologisches Observatorium Davos and World Radiation Center, Davos, Switzerland

<sup>3</sup>American University, Department of Environmental Science, Washington DC, USA

<sup>4</sup>Laboratoire Atmosphère Observations Spatiales, UVSQ, CNRS, Sorbonne University, Guyancourt, France

<sup>5</sup>School of Earth and Environment, University of Leeds, Leeds, UK

<sup>6</sup>National Centre for Earth Observation, University of Leeds, Leeds, UK

<sup>7</sup>Finnish Meteorological Institute, Atmospheric Research Centre of Eastern Finland, 70200 Kuopio, Finland

<sup>8</sup>Max Planck Institute for Meteorology, Bundesstr. 53, 20146 Hamburg, Germany

<sup>9</sup>Sibley School of Mechanical and Aerospace Engineering, Cornell University, Ithaca, NY, USA

<sup>10</sup>Institute of Atmospheric Physics (IPA), German Aerospace Center (DLR), Oberpfaffenhofen, Germany

<sup>11</sup>Meteorological Institute, Ludwig Maximilian University of Munich, Munich, Germany

<sup>12</sup>Yusuf Hamied Department of Chemistry, University of Cambridge, Cambridge, United Kingdom

<sup>13</sup>Japan Agency for Marine-Earth Science and Technology, Yokohama, Japan

<sup>14</sup>Atmospheric Chemistry Observations and Modeling Laboratory, National Center for Atmospheric Research, Boulder, USA

<sup>15</sup>Department of Earth and Atmospheric Sciences, Cornell University, Ithaca, NY, USA

<sup>16</sup>Jinan University, Guangzhou, China

<sup>17</sup>Laboratory for Atmospheric and Space Physics, University of Colorado Boulder, Boulder, USA

<sup>18</sup>University of Colorado Cooperative Institute for Research in Environmental Sciences (CIRES) at the NOAA Chemical Sciences Laboratory, Boulder, CO, USA

**Correspondence:** Christina Brodowsky (brodowsc@ethz.ch), Timofei Sukhodolov (timofei.sukhodolov@pmodwrc.ch)

**Abstract.** Sulfate aerosol in the stratosphere is an important climate driver, causing solar dimming in the years after major volcanic eruptions. Hence, a growing number of general circulation models are adapting interactive sulfur and aerosol schemes to improve the representation of relevant chemical processes and associated feedbacks. However, uncertainties of these schemes are not well constrained. Stratospheric sulfate is modulated by natural emissions of sulfur-containing species, including volcanic eruptive, and anthropogenic emissions. Model intercomparisons have examined the effects of volcanic eruptions, whereas the background conditions of the sulfur cycle have not been addressed in a global model intercomparison project. Assessing background conditions in global models allows us to identify model discrepancies as they are masked by large perturbations such as volcanic eruptions, yet may still matter in the aftermath of such a disturbance.

Here, we analyze the atmospheric burden, seasonal cycle, and vertical and meridional distribution of the main sulfur species among nine global atmospheric aerosol models that are widely used in the stratospheric aerosol research community. We use observational and reanalysis data to evaluate model results. Overall, models agree that the three dominant sulfur species in

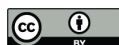

terms of burdens (sulfate aerosol, OCS, and SO<sub>2</sub>) make up about 98% of stratospheric sulfur and 95% of tropospheric sulfur. However, models vary considerably in the partitioning between these species. Models agree that anthropogenic emission of SO<sub>2</sub> strongly affects the sulfate aerosol burden in the Northern Hemispheric troposphere, while its importance is very uncertain in other regions. The total deposition of sulfur varies among models, deviating by a factor of two, but models agree that sulfate aerosol is the main form in which sulfur is deposited. Additionally, the partitioning between wet and dry deposition fluxes is highly model dependent. We investigate the areas of greatest variability in the sulfur species burdens and find that inter-model variability is low in the tropics and increases towards the poles. Seasonality in the southern hemisphere is depicted very similar among models. Differences are largest in the dynamically active northern hemispheric extratropical region, hence some of the differences could be attributed to the differences in the representation of the stratospheric circulation among underlying general circulation models. This study highlights that the differences in the atmospheric sulfur budget among the models arise from the representation of both chemical and dynamical processes, whose interplay complicates the bias attribution. Several problematic points identified for individual models are related to the specifics of the chemistry schemes, model resolution, and representation of cross-tropopause transport in the extratropics. Further model intercomparison research is needed focusing on the clarification of the reasons for biases, given also the importance of this topic for the stratospheric aerosol injection studies.

## 1 Introduction

Sulfur in the atmosphere modulates incoming solar radiation, affects the ozone layer, fertilizes soils, and impacts air quality in industrial areas. The most abundant gaseous sulfur species in the atmosphere are carbonyl sulfide (OCS) and sulfur dioxide (SO<sub>2</sub>). Shorter lived or emitted in smaller amounts, and therefore less abundant, are dimethyl sulfide (DMS), emitted from marine phytoplankton, hydrogen sulfide (H<sub>2</sub>S), or carbon disulfide (CS<sub>2</sub>) (SPARC, 2006). Only a fraction of the sulfur emitted at the surface is transported to the stratosphere, with the majority scavenged in the mid-troposphere (see e.g. Feinberg et al., 2019). In the stratosphere, these sulfur-containing species get photolyzed and oxidized to eventually form sulfuric acid (H<sub>2</sub>SO<sub>4</sub>), the final oxidation product. Because of its low saturation vapor pressure, gaseous H<sub>2</sub>SO<sub>4</sub> then readily condenses and/or nucleates in combination with water vapor to aerosol particles, forming the "Junge Layer", a layer of aqueous sulfuric acid droplets (in short "sulfate aerosol") in the region between the tropopause and about 10 hPa (Junge et al., 1961). During volcanically quiescent (background) periods, the Junge Layer is maintained by surface emissions of these precursor gases and their oxidation products and is assumed to be relatively constant. On the other hand, with the injection of wildfire smoke and the influence of frequent small and moderate volcanic eruptions, there are only a few years within the satellite era, when the stratospheric aerosol layer can be considered close to background or unperturbed (e.g. Vernier et al., 2011; Kremser et al., 2016).

Most of the research related to the aerosol layer has been focused on large volcanic eruptions and their influence on climate (e.g. Zanchettin et al., 2016), atmospheric composition (e.g. Aquila et al., 2013) and dynamics (e.g. DallaSanta et al., 2019). While large volcanic events are established as one of the main natural climate drivers (Masson-Delmotte et al., 2021), small volcanic eruptions have also been shown to significantly contribute to the global radiative forcing and climate variability

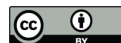

45 (Schmidt et al., 2018; Andersson et al., 2015). In addition, the background aerosol layer itself undergoes substantial inter-  
annual variations (Hommel et al., 2015; Kovilakam et al., 2020). The stratospheric aerosol layer has become of interest for a  
more controversial reason as well: to moderate global climate warming, it has been proposed to inject sulfate aerosol precursors  
in the stratosphere in an attempt to mimic the global surface cooling generated by large volcanic eruptions and thus counter-  
act the climate warming from increased greenhouse gases (e.g. Robock, 2008; Crutzen, 2006). Predicting the effects of the  
50 stratospheric aerosol variations requires the simulation of multiple coupled processes with complex global general circulation  
models (GCMs) that are still subject to significant uncertainties. In these global models, chemical species and aerosols can be  
either prescribed or calculated interactively as prognostic variables. The former approach, while being computationally less  
expensive, is limited by uncertainties in the observations used to derive the prescribed distributions and does not account for  
the coupling of processes and internal feedbacks that would impact the distributions themselves. Furthermore, biases of up to  
55 20% in aerosol extinction measurements across different satellite instruments mean that small variations cannot currently be  
adequately quantified by observations (Kremser et al., 2016). Models with interactive aerosol schemes and chemistry, on the  
other hand, have many parameters, and potentially more degrees of freedom (and therefore more sources of uncertainty) but  
can account explicitly for the feedbacks between aerosol microphysics and dynamical and chemical processes.

With the growing availability of computational resources and scientific evidence of a potentially large role of the Junge  
60 Layer in future climate (Chim et al., 2023; Aubry et al., 2021), increasing numbers of GCMs are now including interactive  
sulfur and aerosol schemes to improve the representation of relevant chemical processes and associated feedbacks. In order to  
evaluate the individual model performances and characterize the inter-model uncertainty in the involved processes, there have  
been several model intercomparison studies focused on elevated aerosol conditions due to volcanic events (Marshall et al.,  
2018; Clyne et al., 2021; Quaglia et al., 2023) and artificial sulfur injections (Franke et al., 2021; Weisenstein et al., 2022).  
65 So far, apart from the limited and quite old global aerosol model intercomparison for non-volcanic conditions described in the  
SPARC (2006) report, all previous global stratospheric aerosol model intercomparison studies have focused on the volcanically  
perturbed aerosol layer. This is an unusual situation because, whatever processes or climate components are considered in a  
model evaluation, models are generally assessed first for background conditions before moving to perturbed conditions. The  
few model studies on the background state of the aerosol layer are almost all single model studies, leaving the possibility that  
70 some of the results and conclusions might be model-dependent. The results of these studies show quite good agreement with  
observations for specific parameters but also reveal discrepancies for others (Hommel et al., 2011; Brühl et al., 2012; Sheng  
et al., 2015; Mills et al., 2016; Feinberg et al., 2019). Note that in the majority of models, the background conditions have  
not been evaluated at all, and a comprehensive and extensive multi-model assessment with interactive chemistry schemes for  
all sulfate aerosol precursor gases in the background state is still pending. Such a study has the potential to reveal common  
75 deficiencies in the model representation of specific processes, especially with respect to differences between the models, which  
are hard to identify under volcanically perturbed conditions but still have repercussions for model performance. For example,  
Quaglia et al. (2023) noted a difference in the aerosol effective radius among models in experiments on the 1991 Pinatubo  
eruption, which cannot be addressed in detail in a perturbed state. Further, Wrana et al. (2023) showed with measurements  
from SAGE III/ISS, that small volcanic perturbations of the background aerosol layer can lead to an increase or reduction of



80 the aerosol effective radius, depending on the regional background conditions of the individual events. Finally, characterizing  
the background state and its modeling uncertainties can be useful for the next CMIP phase preparations, as the semi-background  
aerosol state (averaged 1850-2014) is usually used for the DECK and SSP experiments (Eyring et al., 2016), and provide better  
radiative forcing estimates of pollutants for the IPCC.

The background (BG) aerosol in the stratosphere is highly dependent not only on the precursor gasses and background  
85 chemistry (e.g. Clyne et al., 2021), but also on the variability and evolution of atmospheric dynamics, which controls the  
stratosphere-troposphere exchange, as well as the general stratospheric circulation, the so-called Brewer-Dobson Circulation  
(BDC) (Butchart, 2014; Aubry et al., 2021). Thus, the model performance in terms of background aerosol layer climatology  
and variability can be expected to be affected by underlying model transport biases. This sensitivity of the modeled aerosol  
90 layer to the stratospheric transport is more difficult to assess for volcanically perturbed conditions because sulfate aerosols  
are much larger than for background conditions and hence sedimentation plays a larger role in terms of aerosol transport and  
global redistribution. The issue of dynamical differences between models has been highlighted in several studies. For example,  
Dietmüller et al. (2018) show large inter-model differences in mixing activity (including horizontal and vertical mixing, as well  
as vertical diffusion), which affects the Age of Air (AoA) and therefore stratospheric transport of chemical species. A recent  
CMIP6 model evaluation of the BDC has revealed that, while models generally agree on the AoA in the lower branch, larger  
95 differences exist in the middle and upper stratosphere (Abalos et al., 2021). Dietmüller et al. (2018) also show how a coarser  
model resolution negatively impacts the representation of the tropical and polar vortex transport barriers. Similarly, Brodowsky  
et al. (2021) show that increasing the model vertical resolution strengthens the sub-tropical transport barrier, increasing the  
residence time of chemical species or aerosol in the tropics. Hommel et al. (2015) show that the stratospheric aerosol layer is  
also highly modulated by the Quasi-Biennial Oscillation (QBO), with non-linear QBO phase-dependent regional effects.

100 To date, no extensive model intercomparison exists on background atmospheric sulfur burdens and distributions, and charac-  
terization of related uncertainties. This activity has been proposed by Timmreck et al. (2018) in the framework of the Interactive  
Stratospheric Aerosol Model Intercomparison Project (ISA-MIP), among other experiments, to comprehensively study and in-  
tercompare the representation of stratospheric aerosol processes in different models. The ISA-MIP BG experiment is designed  
to reproduce volcanically unperturbed conditions of the Junge Layer in a 20-year time slice simulation with predefined bound-  
105 ary conditions. This experiment is expected to reveal common model deficiencies which are not clearly visible in volcanic  
experiments, providing valuable information for guiding improvements in stratospheric aerosol models. Here, we follow the  
proposed BG setup and compare simulations from nine atmospheric models participating in ISA-MIP, as listed in Table 1. The  
aim is to quantify the range of simulated burdens and distributions of stratospheric aerosols and to evaluate the model results  
against satellite-derived observations. We quantify the atmospheric sulfur budget and determine the model spread for each  
110 compound. We provide model estimates for sulfur fluxes, where available, and compare the stratospheric burdens of aerosol  
and SO<sub>2</sub> with satellite-derived datasets. We, therefore, identify existing uncertainties in state-of-the-art stratospheric aerosol  
models by examining various aspects of the spatial and temporal distribution of the most abundant sulfur species, and examine  
the effective radius and surface area density (SAD).

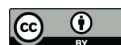

The experimental setup and the models involved are described in Sect. 2.1 and 2.2, respectively. Sect. 2.3 describes all  
115 observational datasets used for model evaluation. In Sect. 3.1, we discuss the full sulfur budget in the participating models,  
including some of the main chemical processes influencing the aerosol layer, emissions of aerosol precursors, cross-tropopause  
fluxes, stratospheric burdens, reactions, and deposition. We also present the total sulfur budget, summed over all sulfur species.  
Seasonal cycles and meridional distributions are presented in Sect. 3.2. The distribution of three major sulfur species is shown  
in Sect. 3.3. Sect. 3.4 discusses effective radius and surface area density. Finally, the conclusions of this work are presented in  
120 Sect. 4.

## 2 Data & Methods

### 2.1 Experimental setup

We follow the setup described by Timmreck et al. (2018) in the BG experiment BG\_QBO for all models unless otherwise spec-  
ified in the model description (hereafter called REF). The simulations are set up as 20-year time-slice simulations using repeat-  
125 ing boundary conditions of the year 2000. A second simulation, termed BG\_NAT (hereafter called NAT), has the same setup,  
except all anthropogenic sulfur emissions were excluded (Timmreck et al., 2018). The difference in SO<sub>2</sub> emissions between  
these two experiments is shown in Fig. A1. All aerosol and sources of aerosol precursors, except explosive volcanic eruptions,  
are included in this study. In the models without an internally generated QBO (see Table 1), the QBO is nudged to the 1981-  
2000 period. All models have been recommended to use prescribed sea surface temperatures (SSTs) and sea ice coverage (SIC)  
130 from the MetOffice Hadley Center Observational Dataset (Rayner et al., 2003). Sulfur emissions from anthropogenic sources  
as well as biomass burning are taken from the Monitoring Atmospheric Composition and Climate (MACC-City) inventory  
(Granier et al., 2011). Emissions from continuously degassing volcanoes are given by Dentener et al. (2006), based on Andres  
and Kasgnoc (1998). OCS surface concentrations are prescribed and constant at 510 pptv (Montzka et al., 2007; SPARC, 2006).  
If allowed by the model setup, DMS emissions are calculated online using concentrations in the global oceans given by Lana  
135 et al. (2011). Some models include similar online calculations for dust and sea salt, in which case, the oceanic concentrations  
for these compounds are also taken from Lana et al. (2011). Otherwise, models use their usual database. Stratospheric burdens,  
if not directly provided in the output (in CAM5-CARMA, ECHAM5-HAM, WACCM6-CARMA, WACCM6-MAM4, and  
UM-UKCA) were calculated from monthly mean mixing ratios, using standard air in CAM5-CARMA and UM-UKCA, and  
the provided air mass in all other models. The stratospheric burden was then calculated by masking out all grid boxes below  
140 the model tropopause, not accounting for the volume of partially stratospheric grid boxes.

### 2.2 ISA-MIP models

#### 2.2.1 SOCOL-AERv2

The global atmosphere-only chemistry-climate model SOCOL-AERv2 consists of the interactively coupled dynamical core  
ECHAM5 and the chemistry model MEZON, forming SOCOLv3 (Stenke et al., 2013), as well as the aerosol model AER

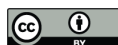

**Table 1.** A list of models that participated in this study and are part of the ISA-MIP<sup>a</sup> project. Described are the horizontal and vertical resolutions as well as if the QBO is internally generated. This is followed by a short description of the aerosol scheme. CAM5-CARMA and WACCM5-CARMA have two sets of aerosol bins for different aerosol types, denoted by 2×20.

| Model               | lat×lon      | levels | top    | QBO             | Aerosol scheme<br>(modes/bins) | References                                                               |
|---------------------|--------------|--------|--------|-----------------|--------------------------------|--------------------------------------------------------------------------|
| <b>SOCOL-AERv2</b>  | 2.8°×2.8°    | 39     | 80 km  | Nudged          | sectional (40)                 | Sheng et al. (2015);<br>Feinberg et al. (2019)                           |
| <b>ULAQ-CCM</b>     | 5°×6°        | 126    | 70 km  | Nudged          | sectional (22)                 | Pitari et al. (2016);<br>Vioni et al. (2018b)                            |
| <b>ECHAM6-SALSA</b> | 1.9°×1.9°    | 95     | 80 km  | Internally gen. | sectional (10+7)               | Kokkola et al. (2018)                                                    |
| <b>CAM5-CARMA</b>   | 1.9°×2.5°    | 56     | 40 km  | Nudged          | sectional (2x20)               | Yu et al. (2015)                                                         |
| <b>ECHAM5-HAM</b>   | 2.8°×2.8°    | 90     | 80 km  | Internally gen. | modal (7)                      | Niemeier et al. (2009)                                                   |
| <b>WACCM6-CARMA</b> | 1.9°×2.5°    | 70     | 140 km | Nudged          | sectional (2x20)               | Tilmes et al. (2023)                                                     |
| <b>WACCM6-MAM4</b>  | 1.9°×2.5°    | 70     | 140 km | Nudged          | modal (4)                      | Mills et al. (2016)                                                      |
| <b>MIROC-CHASER</b> | 2.8°×2.8°    | 57     | 52 km  | Nudged          | modal (3)                      | Sekiya et al. (2016);<br>Watanabe et al. (2011)                          |
| <b>UM-UKCA</b>      | 1.875°×1.25° | 85     | 85 km  | Internally gen. | modal (7)                      | Dhomse et al. (2014);<br>Marshall et al. (2019);<br>Dhomse et al. (2020) |

<sup>a</sup><https://isamip.eu/home>

145 (Weissenstein et al., 1997). The model uses a triangular truncation at wave number 42 (T42), which corresponds to a resolution  
of about 2.8°×2.8° and it extends vertically to 0.01 hPa (or about 80 km). In this study, we use a vertical resolution of 39  
levels. SOCOL-AERv2 uses a sectional aerosol scheme, differentiating 40 size bins. All aerosol in this model is pure sulfate  
aerosol. The microphysics in SOCOL-AERv2 includes a nucleation scheme by Vehkamäki et al. (2002), condensation and  
evaporation according to Ayers et al. (1980) and (Kulmala and Laaksonen, 1990) as well as coagulation (Fuchs, 1964; Jacobson  
150 and Seinfeld, 2004). Sedimentation occurs according to Kasten (1968) and Walcek (2000), whereas aerosol composition is  
derived from Tabazadeh et al. (1997). SOCOL-AERv2 uses interactive dry and wet deposition schemes based on the DRYDEP  
(Kerkweg et al., 2006) and SCAV (Tost et al., 2006) modules. In total, SOCOL-AERv2 distinguishes eight sulfur species (OCS,  
CS<sub>2</sub>, MSA, DMS, H<sub>2</sub>S, SO<sub>2</sub>, SO<sub>3</sub>, H<sub>2</sub>SO<sub>4</sub>), as well as sulfate aerosol and 27 reactions including sulfur species. In addition to  
sulfur species, the model also includes oxygen, hydrogen, nitrogen, carbon, chlorine, and bromine species (Sheng et al., 2015;  
155 Feinberg et al., 2019).



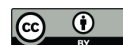

## 2.2.2 ULAQ-CCM

The global scale chemistry-climate model ULAQ-CCM (University of L'Aquila Chemistry Climate Model) has a resolution of  $5^{\circ} \times 6^{\circ}$  (T21) and uses 126 log pressure levels, reaching from the Earth's surface to 0.04 hPa. It treats sulfate, organic and black carbon, dust, sea salt, nitrate, and PSC aerosols (Pitari et al., 2002). Each type of aerosol is treated separately in terms of surface fluxes, transport, and removal from the atmosphere. The wet and dry deposition schemes are based on Müller and Brasseur (1995). Included in the chemistry module are species from the  $O_x$ ,  $NO_y$ ,  $NO_x$ ,  $CHO_x$ ,  $HO_x$ ,  $Cl_y$ ,  $Br_y$ , and  $SO_x$  families. This includes six sulfur species: OCS,  $CS_2$ , DMS,  $H_2S$ ,  $H_2SO_4$  and  $SO_2$ , as well as the long-lived species  $N_2O$ ,  $CH_4$ , CO, hydrocarbons, CFCs, hydrochlorofluorocarbons, and halons. (Pitari et al., 2016; Vioni et al., 2018a). For ULAQ, only ten years of the simulation were conducted.

## 2.2.3 WACCM6-CARMA and WACCM6-MAM4

In this study, we include simulations with the Community Earth System Model version 2 (Danabasoglu et al., 2020), which consists of the Community Atmosphere Model version 6 (CAM6) in its high-top configuration, named the whole Atmosphere Community Climate Model version 6 (WACCM6). We use the Middle Atmosphere (MA) chemistry mechanism (Gettelman et al., 2019). Hereafter, we call this model setup WACCM6-MA. In our setup, WACCM6-MA has 70 vertical levels reaching up to 140 km above the surface. We set the horizontal resolution of  $1.9^{\circ} \times 2.5^{\circ}$ . This model includes a comprehensive chemistry scheme in the stratosphere, mesosphere, and lower thermosphere, while only representing limited chemistry in the troposphere (Gettelman et al., 2019). The model accounts for sulfur chemistry of important precursor emissions for both the troposphere and stratosphere, including four sulfur species OCS, DMS,  $SO_2$ , and  $H_2SO_4$  (Mills et al., 2016).

WACCM6 is coupled to two different aerosol microphysical modules. The Modal Aerosol Model (MAM4) (Liu et al., 2012, 2016), which includes updated prognostic stratospheric sulfate aerosols (Mills et al., 2016), is the default aerosol scheme used in CAMchem and WACCM6 of CESM2. Four modes are described by MAM4 microphysics: Aitken, accumulation, and coarse modes, as well as a primary carbon mode (Liu et al., 2016). The geometric standard deviation of MAM4 for the Aitken and accumulation mode is 1.6, while for the coarse mode, it is 1.2 (Liu et al., 2016; Mills et al., 2016).

The second aerosol microphysical model coupled to WACCM6 is the Community Aerosol and Radiation Model for Atmospheres (CARMA) version 4.0, which enables size-resolved or sectional cloud droplets and aerosol particles (Toon et al., 1988). The CARMA aerosol model includes prognostic aerosols for both the troposphere and the stratosphere, as discussed in Yu et al. (2015) and additional changes highlighted in Tilmes et al. (2023). Apart from pure sulfate aerosol, WACCM6-CARMA is one of two models participating in this study, which include an internally mixed group of aerosol. It involves sulfate, primary and secondary organics, black carbon, dust, and sea salt. The model divides each group into 20 discrete mass bins, as defined by Yu et al. (2015). The mixed aerosol group specifies bins with radii between 0.05 to 8.7  $\mu m$ , whereas radii of the pure sulfate group range from 0.2 nm to 1.3  $\mu m$ . The aerosol composition is based on Tabazadeh et al. (1997).



#### 2.2.4 ECHAM6-SALSA

The aerosol-climate model ECHAM6-SALSA (ECHAM6.3-HAM2.3-MOZ1.0-SALSA2.0 is comprised of the ECHAM6.3 general circulation model (Stevens et al., 2013) and the HAM aerosol module (Tegen et al., 2019). The last component is the aerosol microphysics module SALSA2.0 (Kokkola et al., 2018). The model was set up with a T63 resolution, corresponding to a  $1.9 \times 1.9$  horizontal grid. Further, it uses 95 vertical levels with a top at 0.01 hPa. The microphysical scheme SALSA uses ten fixed size bins, ranging from 3 nm to 10  $\mu\text{m}$ , while the seven largest bins additionally treat soluble and insoluble aerosol (Kokkola et al., 2018). In this study, we use the parameterized sulfuric acid-water binary homogeneous nucleation parameterization (Vehkamäki et al., 2002) for nucleation. The Analytical Predictor of Condensation (APC) scheme is applied to calculate condensation (Jacobson, 1997), while coagulation is treated according to Lehtinen et al. (2004). Apart from sulfate, SALSA also includes organic aerosol, sea salt, black carbon, and mineral dust. The deposition and sedimentation in SALSA are presented by Bergman et al. (2012). ECHAM6-SALSA uses a simplified chemistry scheme from HAM (Feichter et al., 1996; Zhang et al., 2012) and includes oxidation of DMS and  $\text{SO}_2$  via a range of oxidizing agents (OH,  $\text{H}_2\text{O}_2$ ,  $\text{NO}_2$ , and  $\text{O}_3$ ), prescribed by a monthly mean climatology. ECHAM6-SALSA includes three of the main sulfur gases (DMS,  $\text{SO}_2$ , and  $\text{H}_2\text{SO}_4$ ), whereas OCS is not included.

#### 2.2.5 ECHAM5-HAM

ECHAM5-HAM uses the high-top version of ECHAM5 (Giorgetta et al., 2006) and is coupled to HAM, an aerosol microphysical model (Stier et al., 2005). The horizontal grid has a  $2.8^\circ \times 2.8^\circ$  resolution, whereas vertically, there are 90 layers up to 0.01 hPa, corresponding to 80 km. Microphysics in HAM treats the oxidation of sulfur, including sulfate aerosol formation. This encompasses nucleation, accumulation, condensation/evaporation, and coagulation. To improve the stratospheric aerosol representation, modifications were made to the microphysical core M7 (Vignati et al., 2004) of HAM (Niemeier et al., 2009), especially for high sulfur loads after volcanic eruptions. HAM uses modal size distribution, comprised of four modes. The simulations for this paper used nucleation, Aitken, and accumulation mode with a mode width of 1.59 and a coarse mode with a mode width of 2. Another addition was made to HAM in the form of a simple stratospheric sulfur chemistry scheme (Timmreck, 2001; Hommel et al., 2015). The sulfur chemistry in ECHAM5-HAM tracks four sulfur gases, namely OCS, DMS,  $\text{SO}_2$ , and  $\text{H}_2\text{SO}_4$ . As the chemistry scheme is not fully interactive, monthly fields for OH,  $\text{NO}_2$ , and  $\text{O}_3$ , as well as photolysis rates of OCS,  $\text{H}_2\text{SO}_4$ ,  $\text{SO}_2$ , and  $\text{O}_3$  are prescribed on a monthly mean basis. A general description of the performance of HAM is described in Stier et al. (2005), Zhang et al. (2012), and Niemeier and Timmreck (2015).

#### 2.2.6 CAM5-CARMA

CAM5-CARMA is a low-top version of the Community Earth System Model (CESM1), coupled to the aerosol microphysical model CARMA, which is described in Sect. 2.2.3. It has a horizontal resolution of  $1.9^\circ \times 2.5^\circ$  and runs on hybrid 56 vertical levels (Yu et al., 2015). The model includes full stratospheric and tropospheric chemistry, using the chemistry module MOZART-4 (Emmons et al., 2010). CARMA tracks organic carbon, black carbon, dust, and sea salt, as well as an internally mixed type





(Yu et al., 2015). Secondary organic aerosol is included and based on Pye et al. (2010). CARMA provides a sectional aerosol  
220 scheme, tracking 20 particle size bins for aerosol, and another 20 for mixed aerosol. DMS emissions are based on Kloster et al.  
(2006). The chemistry scheme in CAM5-CARMA includes 230 chemical reactions. Sulfur chemistry is based on English et al.  
(2011) and includes 22 gas phase and five heterogeneous reactions, summarized in Yu et al. (2015). Three sulfur species are  
tracked in CAM5-CARMA, additionally to sulfate aerosol: OCS, SO<sub>2</sub>, and H<sub>2</sub>SO<sub>4</sub>. For this simulation, CAM5-CARMA was  
nudged to MERRA reanalysis. Instead of the 20-year time-slice simulation, we use 20 ensemble members for the year 2000.

## 225 2.2.7 MIROC-CHASER

The global chemistry-climate model MIROC-CHASER (Sudo et al., 2002; Watanabe et al., 2011) consists of the Model for  
Interdisciplinary Research on Climate (MIROC) and the atmospheric chemistry model CHASER (Sudo et al., 2002; Sudo and  
Akimoto, 2007) and the Spectral Radiation-Transport Model for Aerosol Species (SPRINTARS) (Watanabe et al., 2011). For  
this study, the model is set up with a 2.8°×2.8° horizontal resolution and 57 vertical levels up to 52 km. The aerosol module  
230 SPRINTARS tracks sulfate aerosol with three modes (nucleation, Aitken, and accumulation) and uses the bulk approach for  
black carbon and organic matter, dust, and sea salt (Sekiya et al., 2016). DMS emissions in MIROC-CHASER are a function of  
downwelling short-wave radiation. Nucleation is based on Vehkamäki et al. (2002), while coagulation follows the same scheme  
as ECHAM5-HAM (Stier et al., 2005). The chemical scheme in CHASER includes 93 species as well as 263 reactions. Sulfur  
chemistry is included in the form of 12 reactions, as well as four of the main sulfur species (SO<sub>2</sub>, SO<sub>4</sub>, DMS, OCS) (Sekiya  
235 et al., 2016).

## 2.2.8 GA4-UKCA

The first UM-UKCA simulation submitted for the ISA-MIP BG\_QBO experiment (Timmreck et al., 2018) is with the inter-  
active stratospheric aerosol configuration of the UM-UKCA model (Bellouin et al., 2013; Dhomse et al., 2014). The model  
runs with a horizontal resolution of 1.875°×1.25° and on 85 levels with a model top at approximately 85 km. Specifically, this  
240 first UM-UKCA submission to BG applies the identical v3-stratosphere-troposphere UKCA codebase also run for the ISA-  
MIP HErSEA-Pinatubo experiment (Dhomse et al., 2020), as further analyzed by Quaglia et al. (2023), each of the ISA-MIP  
UM-UKCA runs within the GA4 configuration of the UM general circulation model (Walters et al., 2014).

This version 3 of stratosphere-troposphere GA4-UM-UKCA comprises version 8.2 of the GLOMAP-mode aerosol mi-  
crophysics module (see Dhomse et al., 2020), implemented within the RJ4.0 configuration of the UK Chemistry and Aerosol  
245 sub-model, as released to the UK academic community within GA4 (Abraham et al., 2012). For the ISA-MIP BG\_QBO experi-  
ment, the simulations are within year-2000 time-slice atmosphere-only simulations, with boundary conditions and tropospheric  
chemistry and aerosol emissions identically as described by Abraham (2014), with the aerosol-radiation and aerosol-cloud in-  
teraction radiative effects and UKCA simulated tropospheric and stratospheric ozone layers fully interactive with the radiative  
transfer module within GA4.

250 The 20-year simulation analyzed is the last 5 years from the UM-UKCA v3 simulation shown in Brooke et al. (2017), with  
an extension for a further 15 years for the BG QBO experiment. As explained in Dhomse et al. (2020), v3 UM-UKCA includes

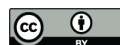

heterogeneously nucleated sulfuric acid aerosol particles with the 7.9 tons per day meteoric smoke particle (MSP) climatology (v3 low-MSP). As configured for the analysis in Brooke et al. (2017), the simulation has the modal desert-dust emissions switched off, desert-dust radiative effects from the UM sectional interactive dust scheme (Woodward, 2001, 2011) rather than from GLOMAP-mode.

The TS2000 atmosphere-only RJ4.0 UM-UKCA model used here is identical to that also applied for the 2000 volcanic forcing perturbed-parameter ensemble (Marshall et al., 2019, 2021) and equivalent also to the pre-industrial setting GA4 UM-UKCA v3 simulations for the Volcanic Forcings Model Intercomparison Project (VolMIP) interactive Tambora experiment (Marshall et al., 2018; Clyne et al., 2021).

### 260 2.3 Observational and reanalysis data

We use several satellite-derived datasets for the stratospheric aerosol layer (NASA/LARC/SD/ASDC, 2012; Damadeo et al., 2013; Revell et al., 2017) and stratospheric SO<sub>2</sub> (Günther et al., 2018) and also in-situ measurements from high altitude balloon soundings (Deshler et al., 2019). An overview of these datasets is provided in Table 2.

For each of these datasets, we use the period 1999–2004 (unless otherwise specified) that is relatively unaffected by volcanic eruptions. Comparing transient observations with time-slice simulations comes with certain caveats, including the influence of the QBO. The influence of the QBO is not limited to the tropical stratosphere, but also affects export from the tropics to mid-latitudes and modulates the strength of the winter polar vortex (Baldwin et al., 2001). Therefore, we do not try to validate models against observational data. Rather, we attempt to qualitatively assess the differences and refer the reader to previous papers in which quantitative model validations have been conducted.

**Table 2.** Observational and reanalysis datasets used in this study and the original resolution of each dataset.

| Variable                                | Dataset/Instrument  | lat×lon     | levels (extent)  | References                                                                      |
|-----------------------------------------|---------------------|-------------|------------------|---------------------------------------------------------------------------------|
| Aerosol burden                          | <b>SAGE-3λ</b>      | 36×1        | 70 (5–40 km)     | Eyring et al. (2016);<br>Kovilakam et al. (2022);<br>B. Luo (pers. comm., 2023) |
| Optical Depth & Extinction              | <b>GloSSAC V2.2</b> | 32×1        | 80 (0–40 km)     | Kovilakam et al. (2020)                                                         |
| SO <sub>2</sub>                         | <b>MIPAS</b>        | 18×6        | 14 (10–23 km)    | Günther et al. (2018)                                                           |
| Surface area density & effective radius | <b>SAGE II</b>      | 32×1        | -/- (0–40 km)    | Damadeo et al. (2013);<br>NASA/LARC/SD/ASDC (2012)                              |
| Temperature                             | <b>ERA-Interim</b>  | 64×128      | 60 (0–0.1 hPa)   | Dee et al. (2011)                                                               |
| Effective radius                        | <b>OPC Laramie</b>  | 41°N, 105°W | -/- (~ 13–30 km) | Deshler et al. (2019)                                                           |

270 We use an aerosol dataset derived using the "3-λ mechanism" as described by Revell et al. (2017), which is based on the Global Space-based Stratospheric Aerosol Climatology version 2.2 (GloSSACv2.2) dataset (see below). These data are derived from extinction measurements at three wavelengths by the Stratospheric Aerosol and Gas Experiment II (SAGE II) (Thomason et al., 2018). The dataset, hereafter called "SAGE-3λ", includes the zonal mean distribution of aqueous H<sub>2</sub>SO<sub>4</sub> concentrations



as monthly mean values from 1979-2021 at 36 latitudes, where the data beyond 80°N and S has been extrapolated. <sup>b</sup> SAGE-3λ  
275 provides data at altitudes every 500 m between 5 km and 40 km. We apply this dataset above the lapse rate tropopause derived  
from ERA-Interim temperature data (Dee et al., 2011).

We evaluate the model-derived extinctions at 525 nm (the wavelength corresponding to SAGE II data with the smallest  
uncertainty) and compare them with the GloSSACv2.2 data, although optical properties are not the main focus of this analysis.  
The GloSSACv2.2 dataset includes the solar occultation SAGE II measurements at four wavelengths out of the seven SAGE  
280 II wavelengths available (Kovilakam et al., 2020; NASA/LARC/SD/ASDC, 2022). The dataset is composed of monthly zonal  
mean values at 32 latitudes ranging from 80° S to 80° N and vertical levels from 0.5 km to 40 km in 500-m intervals.

A level-3 dataset for SO<sub>2</sub> derived from MIPAS is also used in the present study (Günther et al., 2018). To minimize the  
volcanic influence, several months in the dataset that appeared to be affected by eruptions were excluded from the analysis, as  
described by Höpfner et al. (2015). As this leaves significant gaps in the dataset, we use an average over the whole period from  
285 2002 to 2012 for our analysis. Furthermore, we use the temperature distribution provided by this dataset, to derive the lapse  
rate tropopause and calculate stratospheric burdens. We also use the effective radius and aerosol surface area density dataset  
derived from SAGE II with the SAGE version 7.0 algorithm (Damadeo et al., 2013; NASA/LARC/SD/ASDC, 2012). Aerosol  
was assumed to be composed of aqueous sulfuric acid solution at 75 wt% H<sub>2</sub>SO<sub>4</sub>.

We also compare the simulated size distributions to balloon measurements from Laramie, Wyoming at 41° N and 104° W  
290 (Deshler and Kalnajs, 2022). The data have been collected using optical particle counters (OPC), which measure the particle  
concentration in 12 size bins from 0.15 - 2 μm (Deshler et al., 2019).

### 3 Results & Discussion

#### 3.1 The global atmospheric sulfur budget

In Fig. 1 we present the global atmospheric sulfur budget represented by burdens and fluxes of major sulfur species, based  
295 on the input by the nine global atmospheric aerosol models involved in this study (see Table 1). The major sulfur species are  
specified in Gg(S) for the burdens and Gg(S) yr<sup>-1</sup> for fluxes. For the four models CAM5-CARMA, WACCM6-CARMA,  
WACCM6-MAM4 and UM-UKCA, stratospheric burdens are calculated from monthly mean volume or mass mixing ratios,  
integrated from the model tropopause upward, as these burdens were not directly provided by some of the modeling groups.  
Mean emission and deposition fluxes are calculated by averaging the corresponding output from those models that provided  
300 them.

Observational data (in brackets) are from the SAGE-3λ and MIPAS satellite datasets described in Sect. 2.3 for stratospheric  
sulfate aerosol and SO<sub>2</sub> respectively and for the emission and deposition rates from (Feinberg et al., 2019, and references  
therein). Figure 1 is constructed in analogy to figures of the sulfur cycle shown by Feinberg et al. (2019) and Sheng et al.  
(2015). Subsequently, we refer to sulfate aerosol often simply as "aerosol". Additionally, we present the multi-model mean,

---

<sup>b</sup>B. Luo, personal communication

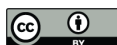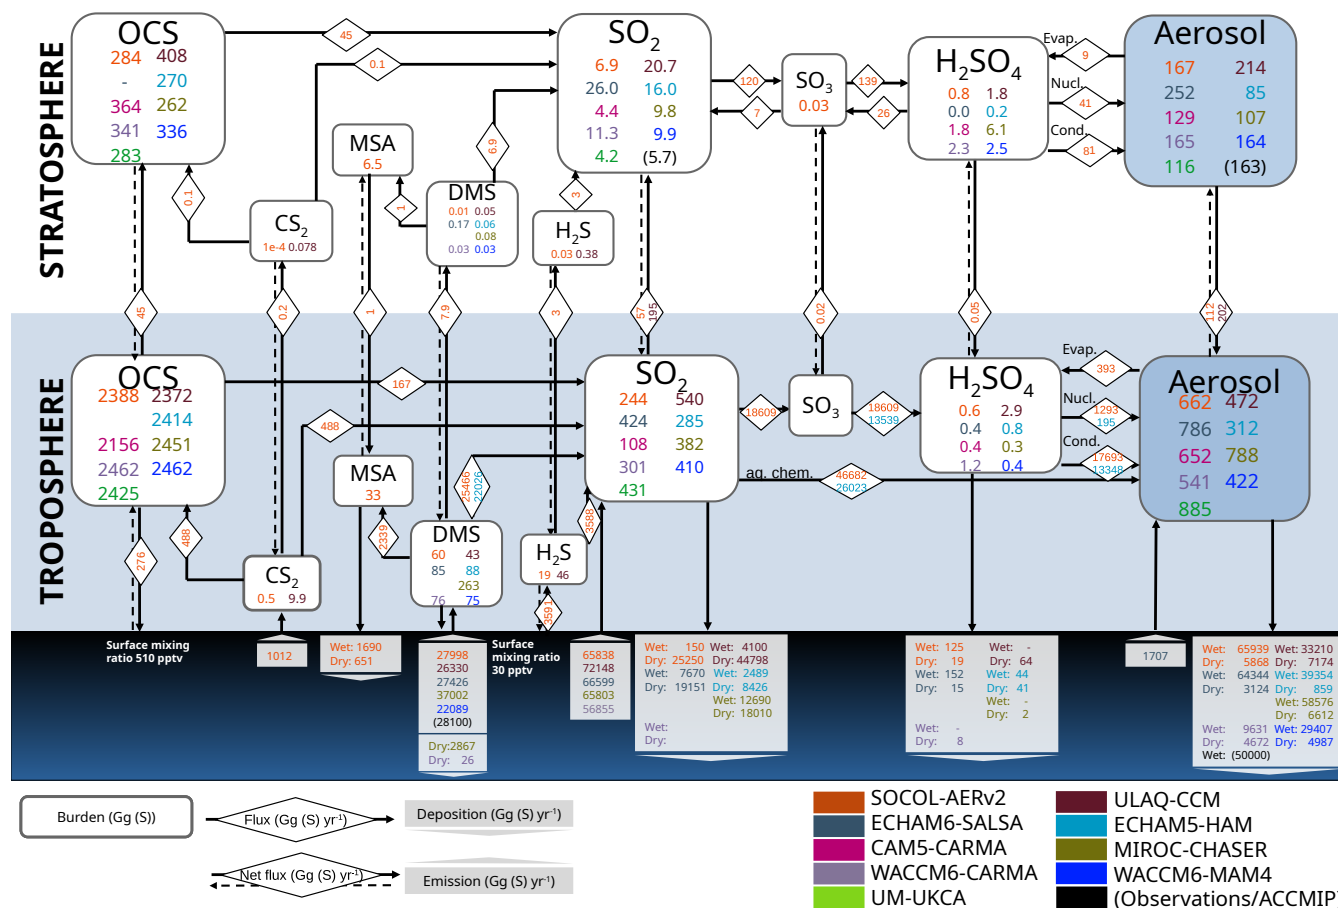

**Figure 1.** The atmospheric sulfur cycle with burdens (in Gg(S)) and fluxes (Gg(S) yr<sup>-1</sup>) for S-gases and sulfate aerosols (displayed in analogy to Feinberg et al. (2019) and Sheng et al. (2015)). **Note that** the term "Aerosol" refers only to sulfate aerosol. The figure includes all burdens as provided by the models involved. For CAM5-CARMA, WACCM6-CARMA, WACCM6-MAM, and UM-UKCA, stratospheric burdens are calculated from monthly mean volume or mass mixing ratios, integrated from the model tropopause upward because these burden values were not provided. Burdens and fluxes are averaged over the entire period. **Observation-derived data, and a multi-model mean** from ACCMIP are in **brackets**. We use SAGE-3λ for aerosol and MIPAS for SO<sub>2</sub>, DMS emission from Lana et al. (2011), and the aerosol wet depositions from a multi-model mean from the ACCMIP models (Lamarque et al., 2013), as previously used in Feinberg et al. (2019). Most fluxes are given as one-way fluxes, while cross-tropopause transport, as well as OCS and H<sub>2</sub>S emissions are provided as net fluxes. **Note that** fluxes are only available for one or two models at a time (SOCOL-AERv2 and ULAQ-CCM or SOCOL-AERv2 and ECHAM5-HAM). Emissions of OCS and H<sub>2</sub>S were prescribed as mixing ratios in the surface layer, in some models. In that case, emission and deposition net fluxes for both species are derived by balancing the sum of the other fluxes of all species.

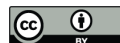

**Table 3.** The multi-model mean, standard deviation, and coefficient of variation of all major species in the troposphere, the stratosphere, and their emissions and depositions. The total tropospheric burden, total stratospheric burden, total emission, and total deposition include the values from all species. Additionally, we provide the fraction of each compound of the total mass of sulfur in each category.

|                            | Tropospheric burden (Gg(S)) |     |                 |                                |         |       | Stratospheric burden (Gg(S)) |       |                 |                                |         |       | Emission (Tg(S)/yr) |     |                    |       | Deposition (Tg(S)/yr) |         |                    |       |
|----------------------------|-----------------------------|-----|-----------------|--------------------------------|---------|-------|------------------------------|-------|-----------------|--------------------------------|---------|-------|---------------------|-----|--------------------|-------|-----------------------|---------|--------------------|-------|
|                            | OCS                         | DMS | SO <sub>2</sub> | H <sub>2</sub> SO <sub>4</sub> | sulfate | total | OCS                          | DMS   | SO <sub>2</sub> | H <sub>2</sub> SO <sub>4</sub> | sulfate | total | SO <sub>2</sub>     | DMS | other <sup>c</sup> | total | SO <sub>2</sub>       | sulfate | other <sup>d</sup> | total |
| <b>Model mean</b>          | 2391                        | 99  | 347             | 0.9                            | 613     | 3364  | 319                          | 0.06  | 12              | 1.9                            | 156     | 486   | 65                  | 28  | 4.3                | 98    | 33                    | 61      | 3.9                | 98    |
| <b>Standard deviation</b>  | 100                         | 69  | 123             | 0.83                           | 161     | 282   | 50                           | 0.05  | 6.8             | 1.8                            | 51      | 85    | 4                   | 4   |                    | 2     | 14                    | 21      |                    | 18    |
| <b>Coeff. of variation</b> | 4%                          | 70% | 35%             | 95%                            | 26%     | 8%    | 16%                          | 82%   | 56%             | 92%                            | 33%     | 18%   | 7%                  | 16% |                    | 2%    | 48%                   | 44%     |                    | 21%   |
| <b>Fraction of total S</b> | 68%                         | 3%  | 10%             | 0.02%                          | 17%     |       | 64%                          | 0.01% | 2.5%            | 0.4%                           | 31%     |       | 65%                 | 28% |                    |       | 37%                   | 61%     |                    |       |

<sup>c</sup> Available only from SOCOL-AERv2 by summing up the chemical fluxes from H<sub>2</sub>S, CS<sub>2</sub> and OCS to SO<sub>2</sub>

<sup>d</sup> DMS, H<sub>2</sub>SO<sub>4</sub>, MSA, with DMS being based on MIROC-CHASER and WACCM-CARMA, and MSA being based only on SOCOL-AERv2

305 standard deviation, and coefficient of variation in Table 3. The coefficients of variation are calculated as the standard deviation divided by the model mean. Mean burdens are calculated by averaging the output of all nine models (except OCS, which is an average over eight models without ECHAM6-SALSA, which does not treat OCS).

### 3.1.1 Precursor gas emissions

Sulfur emissions are dominated by SO<sub>2</sub> with  $65452 \pm 4483$  Gg (S) yr<sup>-1</sup> (model mean plus/minus standard deviation, see Table 3). These emissions are largely of anthropogenic origin, as shown in Fig. A1, where we compare the natural-only versus all emissions in the NAT and REF simulations (from the MACC-CITY inventory). Under anthropogenically perturbed conditions, emissions dominate in the northern hemisphere and are widely present over the ocean as well, in comparison to only-natural emissions. In Fig. 1, ULAQ-CCM has slightly higher and WACCM6-CARMA lower SO<sub>2</sub> emissions than the other models. The second strongest emissions are those of DMS, which show a large model spread with a mean and standard deviation of  $28169 \pm 4453$  Gg (S) yr<sup>-1</sup>. DMS emissions vary the most (with a coefficient of variation of 16%, see Table 3). Models typically calculate DMS emissions online as a function of wind speed and prescribed concentration of DMS in seawater. Large variations in DMS emissions have also been shown in a previous model comparison by Textor et al. (2006). As an important precursor for tropospheric SO<sub>2</sub> (see fluxes provided by ECHAM5-HAM and SOCOL-AERv2 in Fig. 1), this influences tropospheric SO<sub>2</sub> burdens. Figure 1 also shows the model results for OCS and H<sub>2</sub>S for the models where surface mixing ratios are specified instead of emissions. Their contribution to other sulfur-containing species can be tracked via the chemical fluxes provided by the SOCOL-AERv2 model. Their net surface flux is also shown for SOCOL-AERv2, calculated by balancing all other fluxes. Furthermore, ECHAM6-SALSA, WACCM6-CARMA, and WACCM6-MAM4 also include primary sulfate aerosol emissions. For example, in ECHAM6-SALSA, 2.5% of all anthropogenic, wildfire and volcanic sulfur emissions are emitted as sulfate aerosol particles. Finally, CS<sub>2</sub> is included by prescribing emissions; CS<sub>2</sub> is the dominant precursor to the important OCS (but not all models include this process in their chemistry scheme, since OCS is defined by a fixed mixing ratio). Sheng et al. (2015) performed sensitivity experiments with the SOCOL-AERv1 model by isolating the contribution of specific sulfur emissions to the stratospheric aerosol layer. They found that OCS contributes around half to the stratospheric burden, SO<sub>2</sub> one third, and the



rest is mostly from DMS. Note, however, that their estimate for the total stratospheric aerosol burden was 109 Gg(S), which is lower than the value obtained with the new model version (167 Gg(S) in Fig. 1).

### 330 3.1.2 Global tropospheric burdens

Although the implementation details of the sulfur cycle vary widely among the different models, most of them include the three dominant species: OCS, SO<sub>2</sub>, and sulfate aerosol. Calculating the model means of all species in Fig. 1, OCS accounts for about 68% of the total mass of sulfur in the troposphere and varies very little among models with a coefficient of variation of 4% (see Table 3). This is not surprising, because this species is prescribed at the surface and has little chemical sinks in the troposphere, while sinks such as plant uptake are not explicitly modeled. Sulfate and SO<sub>2</sub> represent 17 % and 10 % of the total tropospheric sulfur mass, respectively, though inter-model differences are much larger than for OCS. SO<sub>2</sub> burdens range from 108 Gg(S) in CAM5-CARMA to five times that amount in ULAQ-CCM. Tropospheric aerosol also varies between the lowest values in ECHAM5-HAM at 312 Gg(S) and the highest in UM-UKCA (885 Gg(S)). However, in all models, these species are clearly dominant and leave about 5 % of tropospheric sulfur in the form of DMS, MSA, H<sub>2</sub>S, CS<sub>2</sub>, gas-phase H<sub>2</sub>SO<sub>4</sub> and SO<sub>3</sub>. The latter species are present only in small amounts as a result of their respective short lifetimes (one to a few days in the atmosphere) (SPARC, 2006; Chen et al., 2018) or low vapor pressure in the case of H<sub>2</sub>SO<sub>4</sub>. In contrast, SO<sub>2</sub> remains in the atmosphere for about 10 days and OCS for 2 years (Khalil and Rasmussen, 1984). However, the less abundant species fulfill an important role as precursor gases for sulfate particles. In addition, there are intermediate products of photolysis and oxidation (SPARC, 2006, and references therein), but they are even more short-lived and so are not shown here.

### 345 3.1.3 Global stratospheric burdens

The stratosphere shows a similar distribution of relative abundances as in the troposphere, with OCS accounting for about 64 % of total stratospheric sulfur, while aerosol is 31 % and SO<sub>2</sub> is 2.5 % (see Table 3). Based on its abundance and its lifetime, OCS was identified as the main precursor for background sulfate aerosol by Crutzen (1976) (see also Sheng et al. (2015)). OCS is primarily a product of photolysis and subsequent oxidation of other precursor gases, such as CS<sub>2</sub> (SPARC, 2006). It is characterized by a long tropospheric lifetime and is removed from the atmosphere mainly via plant uptake in the troposphere and photo-oxidation to sulfuric acid (H<sub>2</sub>SO<sub>4</sub>) in the stratosphere (Barkley et al., 2008). The variation between the models is 16%, i.e., somewhat larger in the stratosphere than in the troposphere, with outliers at as much as 28% above the model mean (ULAQ-CCM). The lifetime of OCS is still very long in the stratosphere (years). Therefore, the importance of dynamical (meridional and cross-tropopause transport) and chemical (photolysis) sinks increases. This increases the multi-model spread, given that individual models necessarily have some biases in their representation of dynamical processes. This is discussed further in the context of the spatial distribution in Sect. 3.3.2.

SO<sub>2</sub> represents an important step in the atmospheric sulfur oxidation chain, as all precursor gases are first oxidized to SO<sub>2</sub>, from there to SO<sub>3</sub>, and then to gaseous H<sub>2</sub>SO<sub>4</sub>, which co-condenses with H<sub>2</sub>O to form aerosol particles. The stratospheric SO<sub>2</sub> burden reveals the largest scatter among the three major species (coefficients of variation in Table 3 of ± 56%), with a factor of five difference between the models with the smallest and largest burdens. In addition, the model mean is more





than a factor of two higher than satellite observations. We can group the models in Fig. 1 into three groups with respect to SO<sub>2</sub>: SOCOL-AERv2, CAM5-CARMA, and UM-UKCA have the lowest burdens, while WACCM6-CARMA, WACCM6-MAM4, and MIROC-CHASER are in the middle range, and ULAQ-CCM, ECHAM6-SALSA, and ECHAM5-HAM have significantly higher burdens of SO<sub>2</sub> than the other models. The spatial distribution and plausible reasons for these differences are discussed in Sect. 3.3. Sources of SO<sub>2</sub> in the stratosphere include photo-oxidation of OCS and, just as important, the transport of tropospheric SO<sub>2</sub> across the tropopause. Uncertainties remain regarding the transport of SO<sub>2</sub> to the stratosphere (Kremser et al., 2016), which, besides the complexity of the UTLS transport processes themselves, could also be very sensitive to how the models treat the aqueous oxidation processes in the upper troposphere (Feinberg et al., 2019). Tropospheric aqueous and gas-phase SO<sub>2</sub> oxidation fluxes are presented in Fig. 1 for SOCOL-AERv2 and ECHAM5-HAM, however ECHAM5-HAM shows lower values for both pathways. In the lower stratosphere, SO<sub>2</sub> lifetime with respect to oxidation by OH is 3-4 weeks, making it the source of H<sub>2</sub>SO<sub>4</sub> and subsequently the Junge aerosol. From these considerations, it appears that most of the models underestimate the turnover in the chemical reaction of SO<sub>2</sub> + OH.

The stratospheric aerosol burden is about  $156 \pm 51$  Gg sulfur in the multi-model mean (with standard deviation, see Table 3). This value differs only slightly from the value derived from the SAGE-3 $\lambda$  observational dataset described by Revell et al. (2017, and personal communication with B. Luo). The scatter between the models is rather small, however still with a coefficient of variation of 33% with a factor three difference between model outliers. The reduced scatter for aerosol compared to SO<sub>2</sub> is due to the much longer residence time of aerosol in the stratosphere, as well as the contribution of tropospheric aerosol. A slightly shorter or longer chemical lifetime of SO<sub>2</sub> does therefore not affect the SO<sub>2</sub> burden and the aerosol burden equally. The scatter of aerosol also does not match the scatter of OCS in the stratosphere, because OCS accounts for only about half of the source of stratospheric aerosol, with the other half being the cross-tropopause fluxes of SO<sub>2</sub> and aerosol itself (Sheng et al., 2015). In our analysis, unfortunately, only the net cross-tropopause fluxes are available and also only from few models, which limits the analysis in the attribution of stratospheric biases. In addition, the model differences in stratospheric aerosol loading can also be caused by differences in sedimentation fluxes among models, which in turn depends on aerosol size distribution. Sheng et al. (2015) and Delaygue et al. (2015) estimated that gravitational sedimentation reduces the background stratospheric aerosol burden by about half. In comparison, ECHAM5-HAM exhibits an unusually low aerosol burden. This is likely the result of anomalous concentrations of OH and, thus, slower SO<sub>2</sub> oxidation in the stratosphere, as discussed in Sect. 3.2. Other factors may also contribute, such as differences in the vertical residual velocity in the tropics, which was identified by Niemeier et al. (2020) as a cause of major differences in the aerosol burdens between ECHAM-HAM and WACCM. The highest aerosol values are reported by ECHAM6-SALSA. Laakso et al. (2022) discussed how excessive new particle formation may contribute to such an effect. However, it is unclear if this nucleation bias only applies to scenarios with a large disturbance from volcanic eruptions or stratospheric aerosol injections. Conversely, this has not been observed before in ECHAM6-SALSA (see e.g. Kokkola et al., 2018), with the main difference being the vertical resolution of the model.

Short-lived species, such as DMS and gaseous H<sub>2</sub>SO<sub>4</sub> with lifetimes of less than one day exhibit large scatter between models (with models differing by more than one order of magnitude), but the uncertainties of these burdens do not significantly



395 affect the ones of longer-lived species. Rather, one would need to investigate the reaction rates to determine the processes leading to differences in the burdens of the major species.

Fig. 2 presents the total integrated sulfur burdens. The total emission and deposition rates in ECHAM6-SALSA do not include OCS but are in the same range as most other models, while the total **S-burden** is lower by about the amount of OCS in the other models. However, ECHAM6-SALSA has the highest SO<sub>2</sub> **burdens** out of all models, making more of it available  
400 for oxidation and the formation of aerosol. Deposition is again in the same range as other models, meaning that aerosol may accumulate more.

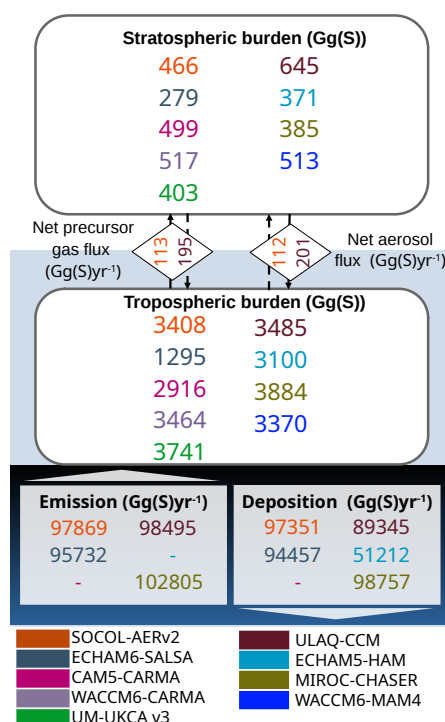

**Figure 2.** The total sulfur balance for each model. All sulfur species are summed up for each model and depicted here in Gg(S). Cross tropopause fluxes (in Gg(S) yr<sup>-1</sup>) are net fluxes of aerosol precursor gases (net upward) plus the net aerosol flux (net downward), which were only provided by SOCOL-AERv2 and ULAQ-CCM. **Note that** the burden for ECHAM6-SALSA is lower, as the model does not include OCS. Therefore this model is excluded from the calculation of the model spread for the total sulfur burden.

### 3.1.4 Wet and dry deposition rates

Deposition rates are mainly available for sulfate aerosol, which is dominated by wet deposition, and for SO<sub>2</sub>, which is dominated by dry deposition, consistent among all models. Some species, such as CS<sub>2</sub> or DMS, are often considered to be entirely  
405 chemically processed and therefore not deposited. While wet and dry deposition rates vary considerably (see for SO<sub>2</sub> or aerosol in Fig. 1), the total deposition of sulfur remains similar among models as seen in Fig. 2. This is not surprising, because the total



sulfur emission flux is meant to be the same (or at least similar) for all models. All emitted sulfur has to be deposited back to the surface, assuming that models **don't** have large errors in mass conservation. ECHAM5-HAM is a strong outlier in terms of total sulfur deposition, with the reason being currently unclear, given that other fluxes available for this model (DMS conversion to SO<sub>2</sub>, SO<sub>2</sub> emission and oxidation fluxes) do not differ much from other models. Textor et al. (2006) discussed the partitioning of sulfur deposition in a global model intercomparison for tropospheric aerosol. They found that, in some models, sulfur is already deposited in the form of precursor gases, therefore resulting in a lower burden and less deposition in the aerosol phase. Here, we see that ULAQ-CCM, ECHAM5-HAM, and WACCM6-MAM, which have lower tropospheric aerosol burdens, also exhibit lower total aerosol deposition rates compared to the other models. However, when adding all reported deposition fluxes together, ECHAM5-HAM has the highest percentage (79% of deposited sulfur) deposited as aerosol, while ULAQ-CCM has the lowest at 45%. Therefore, in ECHAM5-HAM another process must be influencing the deposition rates. Most aerosol is wet deposited, which is consistent with Textor et al. (2006). The total aerosol deposition shown in Fig. A2 (a-f) indicates that it is not just the amount but the spatial distribution of the aerosol deposition that varies considerably among models, though it still mostly resembles the global distribution of precipitation (e.g., Tapiador et al., 2017). Regional differences are influenced by both the aerosol formation processes as well as the biases in the models' precipitation patterns and the details of deposition schemes (Textor et al., 2006; Marshall et al., 2018). In all models, the anthropogenic aerosol (Fig. A2 (g-i)) deposits mostly in the regions where the anthropogenic emission of SO<sub>2</sub> takes place (Fig. A1). This confirms the short tropospheric lifetime of the aerosol, limiting its long-distance transport. In ECHAM5-HAM, 98% of the aerosol deposition is wet deposition, followed by 95% in ECHAM6-SALSA, 92% in SOCOL-AERv2, 90% MIROC-CHASER, 86% in WACCM6-MAM4, and finally ULAQ-CCM with the lowest percentage at 82% wet deposition.

For SO<sub>2</sub>, the dry deposition dominates but varies strongly between models with 99% for SOCOL-AERv2, 92% for ULAQ-CCM, 77% for ECHAM5-HAM, 71% for ECHAM6-SALSA, and only 59% in MIROC-CHASER.

### 3.1.5 Total atmospheric sulfur burden

We present the total sulfur burden in the stratosphere and troposphere in Fig. 2. Although the models have chemistry schemes of various complexities, which affects the partitioning between the sulfur species, the total sulfur burden is similar across models, at  $3861 \pm 294$  Gg (S), for the models including the main three sulfur species OCS, SO<sub>2</sub>, and sulfate aerosol (therefore excluding ECHAM6-SALSA). This corresponds to  $485 \pm 85$  Gg (S) in the stratosphere (12.6% of all atmospheric sulfur) and  $3375 \pm 284$  Gg (S) in the troposphere. The relative difference among models is higher in the stratosphere, as discussed in Sect. 3.3. Fig. 2 also presents estimates from SOCOL-AERv2 and ULAQ-CCM of the net cross-tropopause fluxes of aerosol and aerosol precursors. The two models agree that the sign of the net fluxes is directed upward for precursors and downward for aerosol but disagree on their magnitudes. **Note that** these fluxes are not fully balanced, although they are expected to be somewhat in equilibrium. The reason for ULAQ-CCM is that only the SO<sub>2</sub> flux is available, and the contribution of other species (mainly OCS and DMS, as seen from SOCOL-AERv2 data in Fig. 1) is missing. SOCOL-AERv2 takes into account all the species, therefore the imbalance could be a result of deficient mass conservation in its transport scheme, notably where the tracer gradients are steep (Stenke et al., 2013). As for emissions and deposition fluxes, the values provided in the figure are



quite scattered, because not all variables calculated by models were present in the output provided in the model database and could therefore not be included in our budget calculations. This also explains the inconsistency between the total deposition and the emission fluxes for individual models. All the required output was only provided for SOCOL-AERv2. As a result, the full emission and deposition fluxes for this model are calculated by including the chemical fluxes of minor precursors to SO<sub>2</sub>, resulting in a good agreement between the two. In all other models, this data were not provided in the output, therefore statements about their mass conservation cannot be made. In terms of the model mean values presented in Table 3, individual model nuances are averaged out, resulting in a flux of 98 Tg(S) both for the total emission and deposition.

### 3.2 Seasonal cycle of sulfur compounds

Fig. 3 shows the seasonal cycle of the most abundant sulfur compounds in the atmosphere as well as one of the main oxidizing agents of the atmosphere, the hydroxyl radical (OH). Also depicted in (a-e) is the relationship between the stratospheric sulfate burden and the SAOD for each model, season, and latitude. We see for all species, the multi-model spread is the smallest in the tropical region (here at 30°S-30°N), where the burdens are also lower. The relationship between SAOD and the aerosol burden shows little seasonal dependence and appears linear in this region with respect to multi-model spread. In the extratropics, the burdens of sulfur species are higher, suggesting additional transport through the subtropical tropopause, and a larger spread among the models in terms of the SAOD/aerosol mass relation. This suggests a larger divergence in the aerosol size distribution in the extratropics than in the tropics. Additionally, we see a distinct seasonal cycle in all species outside the tropical region and an increased seasonality of the SAOD/aerosol mass relation in many models.

In addition to an agreement with Fig. 1 in terms of model aerosol burden levels, we observe that the models with higher burdens (ECHAM6-SALSA, ULAQ-CCM) have a stronger seasonal cycle than those with lower burdens (MIROC-CHASER, ECHAM5-HAM, UM-UKCA). ECHAM6-SALSA has the highest burdens in the low and mid-latitudes. ULAQ-CCM is similar to ECHAM6-SALSA in the northern hemispheric polar region and even exceeds the burdens in ECHAM6-SALSA in the southern hemisphere. For aerosol, we observe a minimum at high latitudes in the vortex (panel f) from July to October, followed by an increase, which can be attributed to the breakup of the southern polar vortex. In winter, the polar vortex edge represents a barrier to mixing and transport, preventing extra-polar sulfate from entering, similar to what has been observed for ozone and other species (Schoberl and Hartmann, 1991). In SAGE-3λ, this minimum occurs about one month earlier than in the models. The same pattern is seen for OCS in (k-o). We conclude that this effect is due to dynamics, rather than chemistry. This minimum is discussed in more detail in Sect. 3.3.

In the northern mid-latitudes, most models and SAGE-3λ have minimal aerosol burdens in June, July, and August. In contrast, ECHAM6-SALSA and ULAQ-CCM, have increasing burdens during this time, also seen in high northern latitudes. In the 60°-90° N latitude band, however, the seasonality is not as clear in the models as in the other latitude bands. ULAQ-CCM has two distinct peaks around May/April and again in September/October, while ECHAM6-SALSA and MIROC-CHASER have the highest burdens in this region only in October/November, ECHAM5-HAM and both WACCM6 models, as well as SAGE-3λ can be grouped together with burdens peaking around May, while, in SOCOL-AERv2, a seasonal cycle is not distinguishable. This indicates higher uncertainties in the models in this region, which is directly related to large differences in

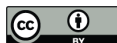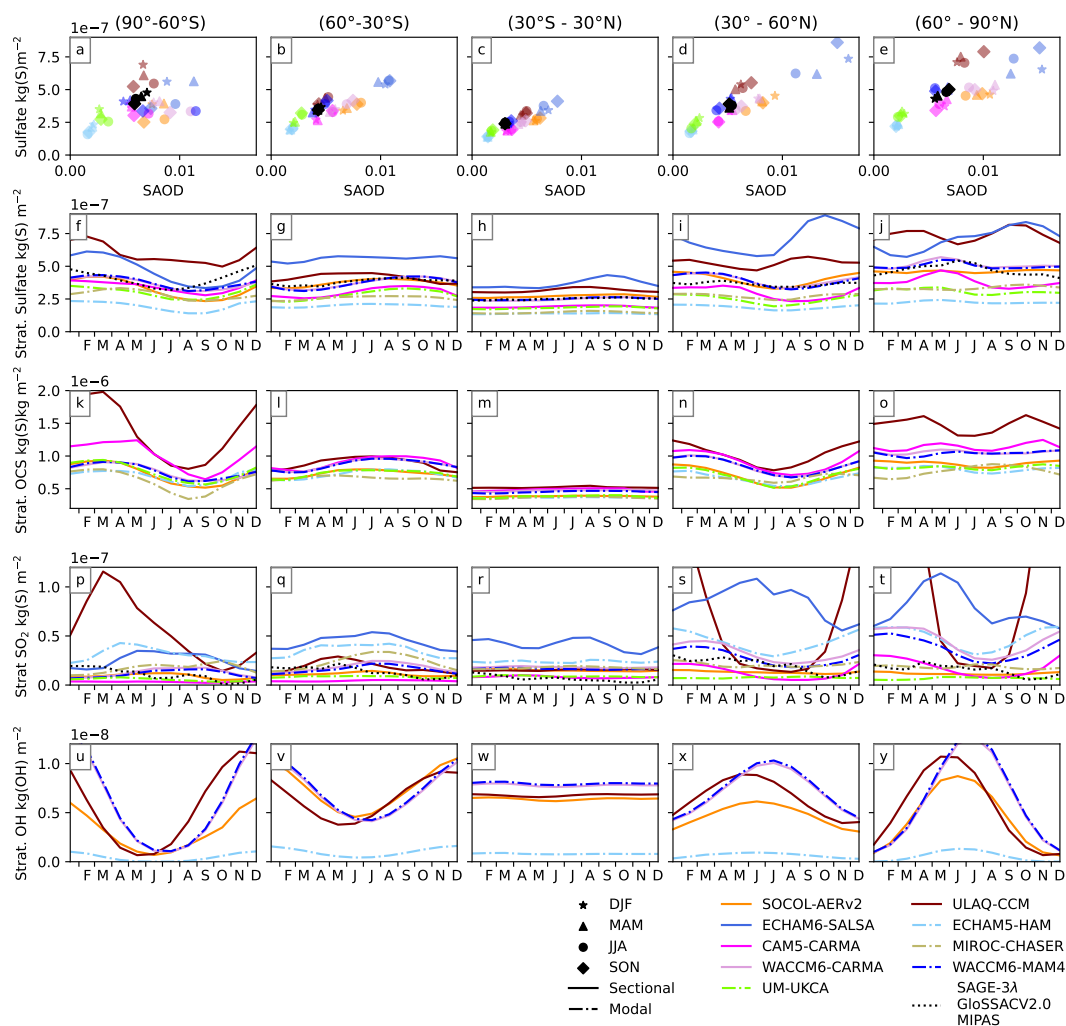

**Figure 3.** The seasonal cycle of the three most abundant atmospheric sulfur species (sulfate aerosol,  $\text{SO}_2$ , and OCS), as well as OH. All data were zonally averaged over the latitude band given in each column title. Additionally, (a-e) represent the relationship between the SAOD and the sulfate burden for five latitude bins. Each season is depicted by a character: A star for winter, a triangle for spring, a circle for summer, and a diamond for autumn. (f-j) depict the seasonal cycle of the stratospheric aerosol burden for each of these latitude bins. In (k-o), we see the stratospheric OCS burden, while (p-t) show the stratospheric  $\text{SO}_2$  burden and (u-y) the stratospheric OH burden respectively. Each burden is given in  $\text{kg}(\text{S})\text{m}^{-2}$  except for OH, which is given as  $\text{kg}(\text{OH})\text{m}^{-2}$ . All data have been averaged over the 20 simulated years for each month.

475 the northern polar vortex climatology and dynamics between the models (Karpechko et al., 2022), also shown in Fig. A3 for the models participating here. In Fig. A3 in DJF ((a.I - i.I)), zonal winds are weaker and temperatures higher than the multi-model mean in the northernmost latitudes in ULAQ-CCM, UM-UKCA, and to a lesser extent also in ECHAM6-SALSA above 40 hPa, and ECHAM6-HAM and MIROC-CHASER below 40 hPa. These differences are, however, rather small in most models



(the largest outlier with temperature anomalies above 7 K being ULAQ-CCM), especially when comparing to differences in  
480 the southern hemisphere, where seasonal cycles are very similar among models despite stronger biases in the southern polar  
vortex winds and temperatures as seen in A3.

Another feature is the similarity between WACCM6-CARMA and WACCM6-MAM4. Considering that the two WACCM6  
models share the same dynamical core but are coupled to different aerosol models, this would indicate that the aerosol model  
does not influence the resulting burden. There are some temperature differences among the two WACCM6 model configurations  
485 in the lower stratosphere, however, the statistical significance of this difference **hasn't** been tested. A comparison of the three  
ECHAM-based models (SOCOL-AERv2, ECHAM6-SALSA, and ECHAM5-HAM) is not as straight-forward, as they have  
different chemistry schemes and different vertical resolutions since they are based on different ECHAM versions: ECHAM5 in  
SOCOL-AERv2 and ECHAM5-HAM versus ECHAM6 in ECHAM6-SALSA. We also discuss in Sect. 3.3, how an internally  
mixed type of aerosol (including other components additionally to sulfur) in CARMA causes differences in the troposphere.  
490 Further, the effective radius varies, as discussed in Sect. 3.4 with potential impacts on SAOD.

The relationship between the SAOD and stratospheric aerosol burden is illustrated in Fig. 3 (a-e). (Note that we use the pure  
sulfate SAOD for Socol-AERv2 and ULAQ-CCM, whereas in WACCM6-CARMA, it is the SAOD of both pure and mixed  
aerosol and in all other models, it is the total SAOD). In general, a higher stratospheric aerosol burden also leads to higher  
SAOD (Fig.3 a-e). This relationship is less clear in the extratropics. The relationship remains highly linear for SAGE-3 $\lambda$ , which  
495 is connected to the assumptions on size distributions in the construction of this dataset. As the relationship between burdens  
and SAOD is very similar among models in the tropics, the conversion schemes in all models are likely to be very similar.  
The differences in the extratropics hint at different size distributions, which influence the SAOD but not the total mass. This is  
discussed briefly in 3.4. Here, WACCM6-MAM4 tends to have lower SAOD than WACCM6-CARMA, revealing differences  
between the two aerosol schemes.

500 The seasonal variability of OCS is very similar to that of sulfate aerosol (Fig. 3 (k-o)). The spread in burdens and irregularity  
in the seasonal cycles appears slightly smaller for OCS. The highest scatter is found in the northern high latitudes with CAM5-  
CARMA now also displaying a second peak, as seen in ULAQ-CCM, around October.

For SO<sub>2</sub> in Fig. 3 (p-t), we can again group together models with low and high burdens, as specified in Sect. 3.1. With  
ULAQ-CCM, ECHAM6-SALSA, and ECHAM5-HAM in the higher range, the WACCM6 models and MIROC-CHASER  
505 in the mid-range, and Socol-AERv2, CAM5-CARMA, and UM-UKCA at the lower end. Possible reasons for higher SO<sub>2</sub>  
burden could be less oxidation or more transport across the tropopause. The stratospheric OH burden is provided in Fig. 3  
(u-y). In ECHAM5-HAM, the OH burden is distinctly lower, supporting the hypothesis that less SO<sub>2</sub> is oxidized and hence  
less H<sub>2</sub>SO<sub>4</sub> is available for aerosol formation. As OH is prescribed in ECHAM5-HAM, further sensitivity studies would need  
to be conducted. In ULAQ-CCM, stratospheric OH is very close to the values of other models. Additionally, while ECHAM5-  
510 HAM is among the highest burdens in all latitudes, burdens in ULAQ-CCM are only elevated in the polar regions and northern  
mid-latitudes. Fig. A3 shows the temperatures in each model compared to the multi-model mean. In ULAQ-CCM in Fig. A3  
(b.I-b.IV), the winter polar stratosphere is warmer and has weaker westerlies compared to the multi-model mean, indicating





a weaker polar vortex and hence a weaker barrier to transport from mid-latitudes to the poles. The distribution of sulfate and SO<sub>2</sub> in ULAQ-CCM will be discussed in more detail in Sect. 3.3.

515 Stratospheric OH is too short-lived to be transported. It is mainly formed by the reaction of H<sub>2</sub>O with O(<sup>1</sup>D) which is a product of O<sub>3</sub> photolysis (Brasseur and Solomon, 2006). Therefore, less OH is available in the wintertime in the middle and high latitudes. Since OH is the most important oxidizing agent for SO<sub>2</sub>, we expect lower OH burdens to correspond to higher burdens of SO<sub>2</sub>. We see that for those models where OH was provided, SOCOL-AERv2, ULAQ-CCM, and WACCM6-CARMA have higher stratospheric OH loadings than ECHAM5-HAM, the latter also having a much less pronounced seasonal  
520 cycle. However, these differences do not directly translate to differences in SO<sub>2</sub> burden as shown by ULAQ-CCM, which has a higher SO<sub>2</sub> burden than the other models. Clyne et al. (2021) discussed the importance of interactive OH during volcanically perturbed conditions, where OH is depleted more rapidly by SO<sub>2</sub> oxidation. In non-interactive chemistry schemes, such as in ECHAM5-HAM and ECHAM6-SALSA, the OH fields may need to be adapted for the conditions, or there could be too much OH available after volcanic eruptions, if the background OH level is used, but too little during quiet conditions, if the  
525 volcanically depleted OH is used.

### 3.3 Spatial and vertical distribution

#### 3.3.1 Sulfate aerosol

Fig. 4 shows the distribution of aerosol in all models (a-i) and SAGE-3λ (k). The relative standard deviation (RSD, expressed as a percentage of the multi-model mean) distribution in panel (l) indicates the regions where the inter-model differences are the  
530 largest. Most of the aerosol mass is concentrated close to the surface, especially in tropical regions, and more pronounced in low northern latitudes. This is likely due to higher SO<sub>2</sub> concentrations in these regions, where anthropogenic emissions originating from East Asia are dominant (Smith et al., 2011; Lee et al., 2011). Fig. A4 (g-l), compares the sulfate mass mixing ratios of the NAT experiment with the REF experiment. It shows how anthropogenic emissions increase aerosol concentrations by 30%, and up to more than 80% locally in the northern hemispheric troposphere and lower stratosphere. The southern hemisphere is less  
535 influenced by anthropogenic emissions. The same feature is seen in the sulfate deposition in Fig. A2 (g-l), which increases by more than 80% over large parts of the northern hemispheric continents. In SOCOL-AERv2 and ULAQ-CCM, the influence of anthropogenic emissions extends higher into the stratosphere, while in ECHAM5-HAM and MIROC-CHASER, this additional SO<sub>2</sub> and aerosol is likely removed before reaching the stratosphere. The WACCM6 models retain some of their similarities discussed in the previous section in Fig. 4. Differences can be seen in the lower troposphere, where mixed aerosols (WACCM6-CARMA) gain importance. However, this does not apply to CAM5-CARMA, which resembles WACCM6-MAM4 more in the  
540 troposphere despite sharing the microphysical scheme with WACCM6-CARMA. The RSD increases rapidly above the lowest model layers in the tropical region, highlighting possible model differences in tropical upwelling and removal of aerosol by convective precipitation. Higher values of the RSD of about 50 % also extend latitudinally in the subtropical tropopause region, indicating model differences in the UTLS transport. Very high values are also seen in the extratropical troposphere. The best

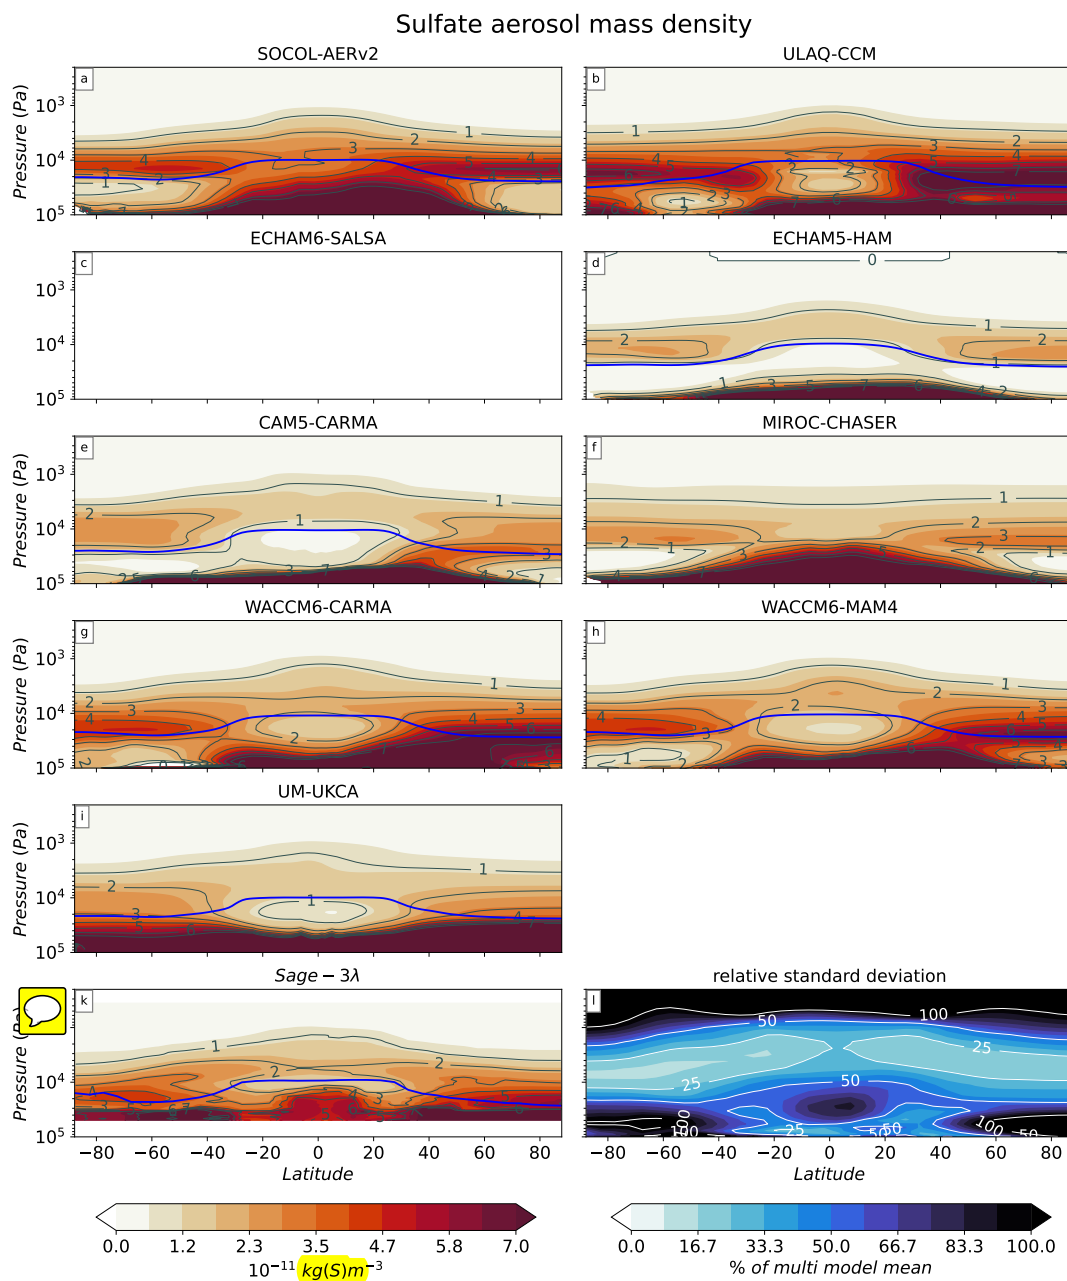

**Figure 4.** Stratospheric aerosol mass density in  $\text{kg(S)} \text{m}^{-3}$  and averaged over the 20 simulation years (10 years for ULAQ-CCM) for each of the models (panels a-i) in comparison with six quiet years from 1999-2004 for SAGE-3 $\lambda$  (panel k). The dark blue lines are the time-averaged tropopauses in each respective model (a-i) and the ERA-Interim tropopause, using the WMO definition, for SAGE-3 $\lambda$  (k). To obtain the mass density, we converted the mass mixing ratios of sulfate aerosol using the ideal gas law and provided temperature and pressure fields. Panel (l) shows the relative standard deviation as a percentage of the multi-model mean, where all model data were interpolated to 39 pressure levels and gridded onto a  $5^\circ \times 5^\circ$  grid.

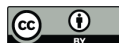

545 model agreement is found in the Junge Layer region. The high values above 10 hPa can be disregarded, as very little aerosol is expected to be at this height.

In SAGE-3 $\lambda$ , the elevated values in the tropical troposphere are likely caused by minor volcanic eruptions. Kovilakam et al. (2020) mention four volcanic eruptions during 1999 and 2004: Ulawun (September 2000), Shiveluch (May 2001), Ruang (September 2002), and Reventador (November 2002). This last eruption emitted the largest amount of SO<sub>2</sub> at around 84 Gg  
550 with a plume height of about 17 km (Carn, 2022).

Considering only the stratosphere in Fig. 4, maxima are seen in the mid-latitudes and polar regions around the tropopause. Since emissions in the northern hemisphere exceed those in the southern hemisphere (Bates et al., 1992) and the stratospheric meridional transport from the tropics is weaker in the southern hemisphere, the overall SH aerosol burden is also slightly lower in most models and in SAGE-3 $\lambda$ . Dynamical processes in the UTLS, such as isentropic mixing may have a strong influence  
555 on the stratospheric burden. The strongest maximum is seen in ULAQ-CCM (see also Fig. 3 with most of the aerosol residing above the tropopause. In all models, in the northern subtropical to mid-latitudes, the higher tropospheric burdens extend to higher altitudes, even "connecting" to the stratosphere. Yu et al. (2017) argued that 15% of northern hemispheric stratospheric aerosol originates from the Asian summer monsoon, where anthropogenic emissions are high (see also Fig. A1). Additionally, this could also be a result of higher emissions in the northern hemisphere, coupled with generally higher convection above the  
560 continents (Takahashi et al., 2023) and isentropic transport and mixing with stratospheric air (Holton et al., 1995). As ULAQ-CCM has the lowest horizontal resolution, which leads to weakened transport barriers (Dietmüller et al., 2018) and stronger numerical diffusion, this effect could be a defining factor in this model. Another factor that could be responsible for the model biases is the climatology and variability of the tropopause. Figure A5 shows a high multi-model spread of the tropopause pressure, especially at high latitudes.

565 The seasonal cycle of the stratospheric aerosol burden is shown in Fig. 5. The main outliers in terms of absolute values are ULAQ-CCM, ECHAM6-SALSA, and ECHAM5-HAM, which is consistent with the values in Fig. 1. As in Fig. 3, the tropical region is marked by low values without an obvious seasonality. This is also evident from the RSD in panel (l) with the lowest values in the tropics. Mid-latitude burdens coincide with the seasonal tropopause shift, where there is a sharp gradient towards the pole around 30°-50° N and S. In the southern hemisphere, the highest burdens extend the furthest north to about 40° S in  
570 Austral winter around August and September. In the northern hemisphere, the pattern is not as smooth and the RSD is also generally larger than in the SH. The largest RSD values lie in the northern mid-latitudes, while most other areas have an RSD of about 20%-40%. As already described in Fig. 4, this mirrors the higher tropospheric burdens at this latitude in ULAQ-CCM and is situated at the same time and place as the Asian summer monsoon (Yu et al., 2017). All models and SAGE-3 $\lambda$ , show an aerosol minimum within the southern winter polar vortex due to the transport barrier in the winter and dominant downward  
575 transport within the vortex that brings sulfur-poor air from above. The RSD is higher in this region, possibly due to inter-model differences in vortex isolation.

As the latitudinal distribution of OCS in Fig. 6 also shows a minimum within the southern hemispheric polar vortex, we conclude that the model scatter is due to differences in the dynamics among models. The magnitude of the aerosol minimum varies little among models (Fig. 5 (l)) and is also present in SAGE-3 $\lambda$ . Still, the timing of the vortex formation and breakup



### Stratospheric aerosol burden

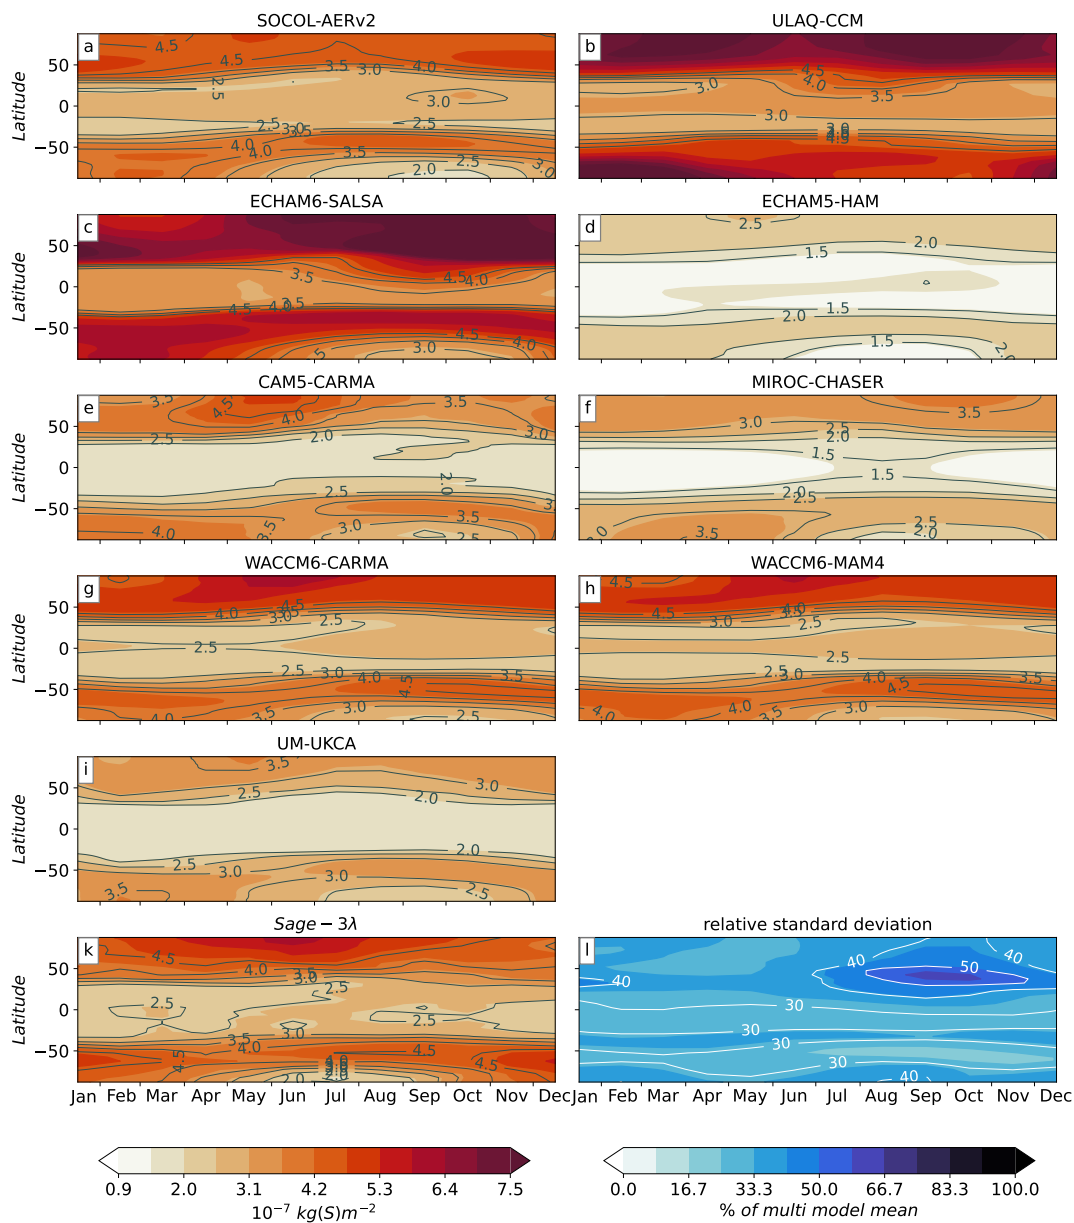

**Figure 5.** The stratospheric aerosol column in  $\text{kg m}^{-2}$ , averaged for each month over the 20 years of simulation, 10 years for ULAQ-CCM, and six years for SAGE-3λ. (a-i) Each represent one model for all latitudes over time. (k) is the SAGE-3λ dataset. (l) shows the RSD of all models (not including SAGE-3λ). All data were gridded to a  $5^\circ \times 5^\circ$  grid to calculate the RSD.

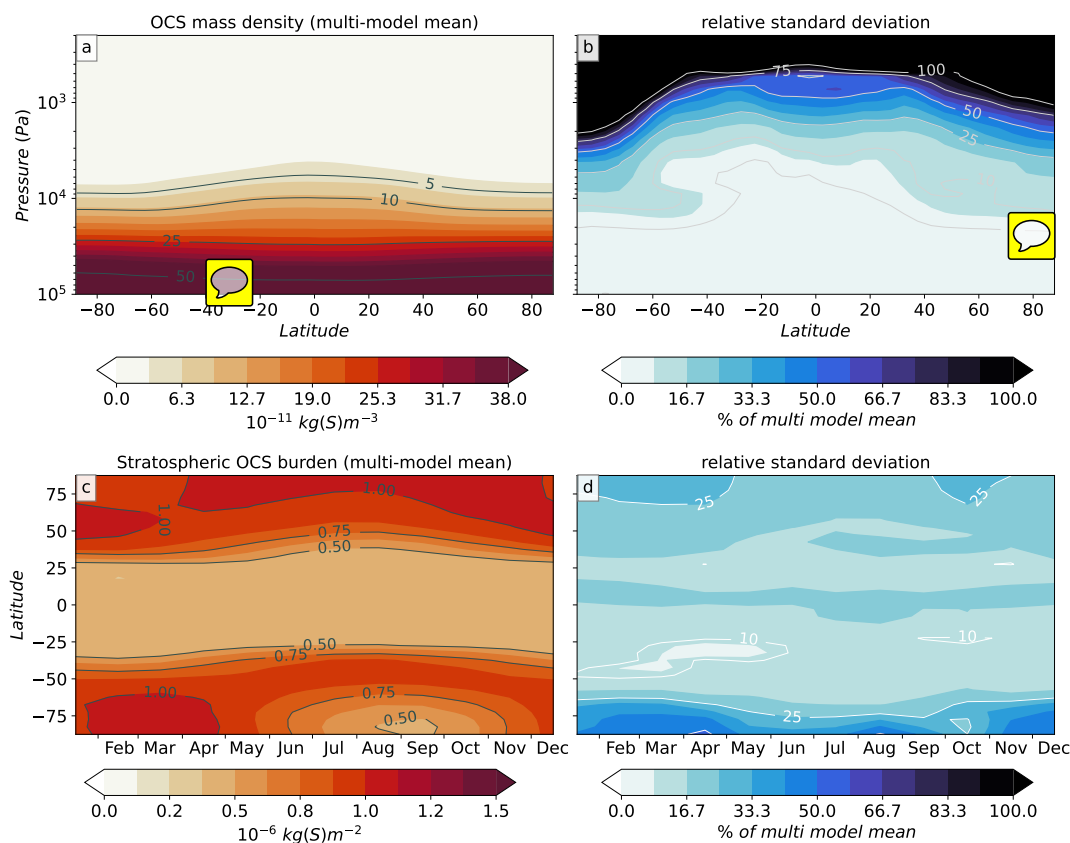

**Figure 6.** The OCS mass density in  $\text{kg(S)} \text{m}^{-3}$  as a multi-model mean of all models which include OCS in (a). All data were interpolated onto the same grid and vertical coordinates. The RSD is shown in (b). Panel (c) depicts the multi-model mean of the stratospheric OCS burden in  $\text{kg(S)} \text{m}^{-2}$ . The RSD for the stratospheric burden is shown in panel (d). The data were calculated from volume mixing ratios of OCS, using the ideal gas law and provided temperature and pressure fields. ECHAM6-SALSA does not track OCS and is therefore not included here.

580 vary among models, and this has repercussions for aerosol transport. (Rao and Garfinkel, 2021) showed that the onset of the stratospheric final warming (SFW) tends to take place too late in many CMIP6 models in both hemispheres. WACCM and MIROC-based models were part of this study, where the former tended to have a delayed SFW by up to 20 days, while MIROC tended to be much closer to the JRA-55 reanalysis (Rao and Garfinkel, 2021). In Fig. 5, we see that in WACCM6-CARMA and WACCM6-MAM4 for example, the aerosol is transported into the polar region only in January, while in SOCOL-  
 585 AERv2, and CAM5-CARMA this takes place already around December and even earlier around November in ECHAM5-HAM, ULAQ-CCM, and UM-UKCA. In MIROC-CHASER, the transport seems to increase gradually over a longer period of time compared to other models, with values already increasing around September-October. Interestingly, in SAGE-3 $\lambda$ , the polar vortex aerosol minimum appears seasonally earlier in comparison to all models. From Fig. A3, which compares the zonal winds and temperature fields from the models to the multi-model mean, it is evident, that the southern winter polar vortex in



590 WACCM6-CARMA, and WACCM6-MAM4 is too strong in September-November (SON), while it is too weak (and warm) in  
ULAQ-CCM and ECHAM5-HAM. For the latter, this indicates an early onset of the SFW as opposed to WACCM6, where it  
takes place at a later time.

Larger differences are seen in the northern mid to high latitudes, as already described in Sect. 3.2. Similarly to the southern  
polar vortex, though much less pronounced, the northern polar vortex is marked by a local minimum in some models. This  
595 is only clear in ECHAM6-SALSA, CAM5-CARMA, WACCM6-CARMA and WACCM6-MAM4. Although most models do  
depict a weak minimum, it is not well resolved in Fig. 5. From Fig. A3, we conclude that the northern polar vortex is too  
weak in ULAQ-CCM, while the signal is not as obvious in other models. A slightly stronger vortex is for example seen in  
ECHAM6-SALSA in December-February (DJF), while CAM5-CARMA, ECHAM5-HAM, and both WACCM6 models are  
slightly too cold in the lower and middle stratosphere. From March to May (MAM), the latter three have more pronounced  
600 northern polar vortices, indicating a generally delayed SFW, as with the southern polar vortex. For aerosol, this means too little  
transport into the polar region, resulting in a lower polar and higher mid-latitude optical depth.

### 3.3.2 Carbonyl Sulfide

The vertical distribution of OCS is very similar in all models, with high burdens close to the surface and a relatively uniform  
gradient with height and much weaker latitudinal variation than for sulfate aerosol, as seen in the multi-model mean in Fig. 6.  
605 In the tropics, OCS is found at slightly lower pressures than at mid and high latitudes, due to the vertical transport in this region  
(Plumb and Eluszkiewicz, 1999). Subsequently, OCS is oxidized and forms SO<sub>2</sub> at around 20 km (or ca. 60 hPa). Oxidation  
via O and OH only plays a minor role (Turco et al., 1979; Crutzen, 1976; SPARC, 2006). The low inter-model spread is also  
reflected in the RSD with very low values in most of the troposphere. As the mass of OCS decreases, the RSD increases  
with height. In (b), we see that the largest RSD values are in the stratosphere, although at altitudes above 10 hPa, this can be  
610 disregarded as not much OCS is present there.

In terms of seasonality of the stratospheric burden, OCS showed similar issues as were discussed for sulfur in individual  
models in the previous section, though the RSD is generally smaller. It is the largest in the polar regions, which is strongly  
related to the differences of the tropopause (see Fig. A5). **Notably**, the tropopause in ULAQ-CCM extends lower in the polar  
regions than in other models, which with this uniform distribution of OCS allows more of it to reside in the stratosphere. This  
615 results in a pattern similar to sulfate in Fig. 4, where ULAQ-CCM has high burdens in the lower extratropical stratosphere,  
explaining its high total OCS burden in Fig. 1.

### 3.3.3 Sulfur dioxide

SO<sub>2</sub> mass density is largest in the lower troposphere and the UTLS and decreases in the higher stratosphere (Fig. 7). In some  
models, higher SO<sub>2</sub> values can also be seen in the tropical free troposphere. SO<sub>2</sub> burdens are higher directly below rather than  
620 above the tropical tropopause, which is opposite to the behavior of the aerosol burden in Fig. 4, as a result of the conversion  
of SO<sub>2</sub> to H<sub>2</sub>SO<sub>4</sub> and subsequently sulfate during the vertical transport of air in this region. Similarly to Fig. 4, higher SO<sub>2</sub>  
values reach up to the tropopause in most models north of about 30° N. This is again a result of anthropogenic SO<sub>2</sub> emissions



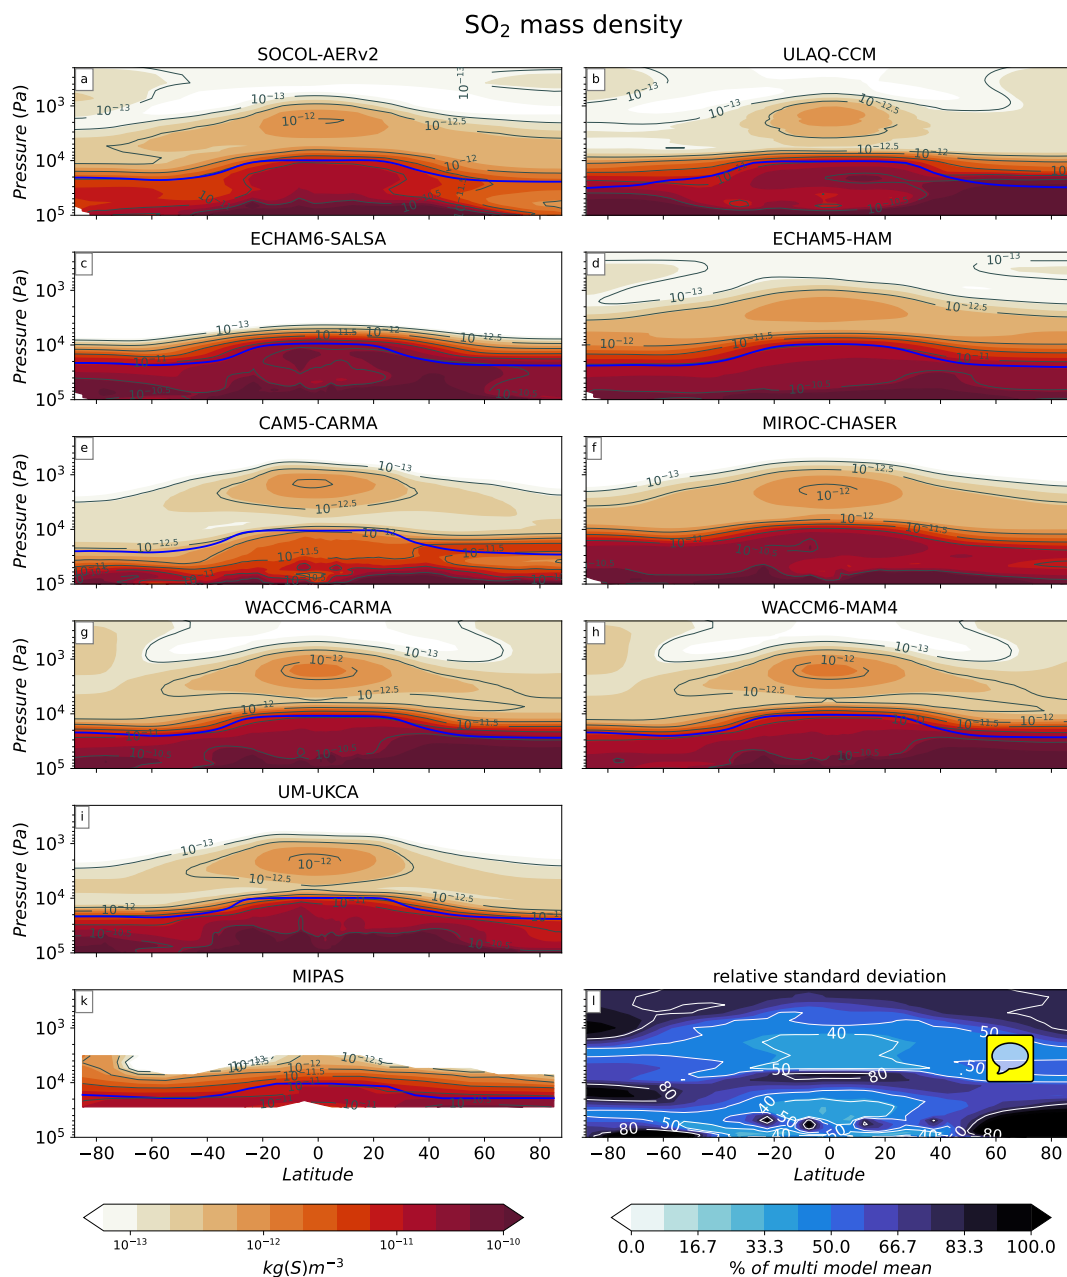

**Figure 7.** The stratospheric SO<sub>2</sub> burden in kg m<sup>-3</sup> on a logarithmic color scale. The models are depicted in (a-i), while the MIPAS-derived dataset is shown in (k). The RSD in (l) is obtained from the multi-model ensemble. The tropopause is shown as a blue line and was averaged over the simulated time period and all longitudes. The mass density was obtained from volume mixing ratios, using the model temperature and pressure applied to the ideal gas law.



Stratospheric SO<sub>2</sub> burden

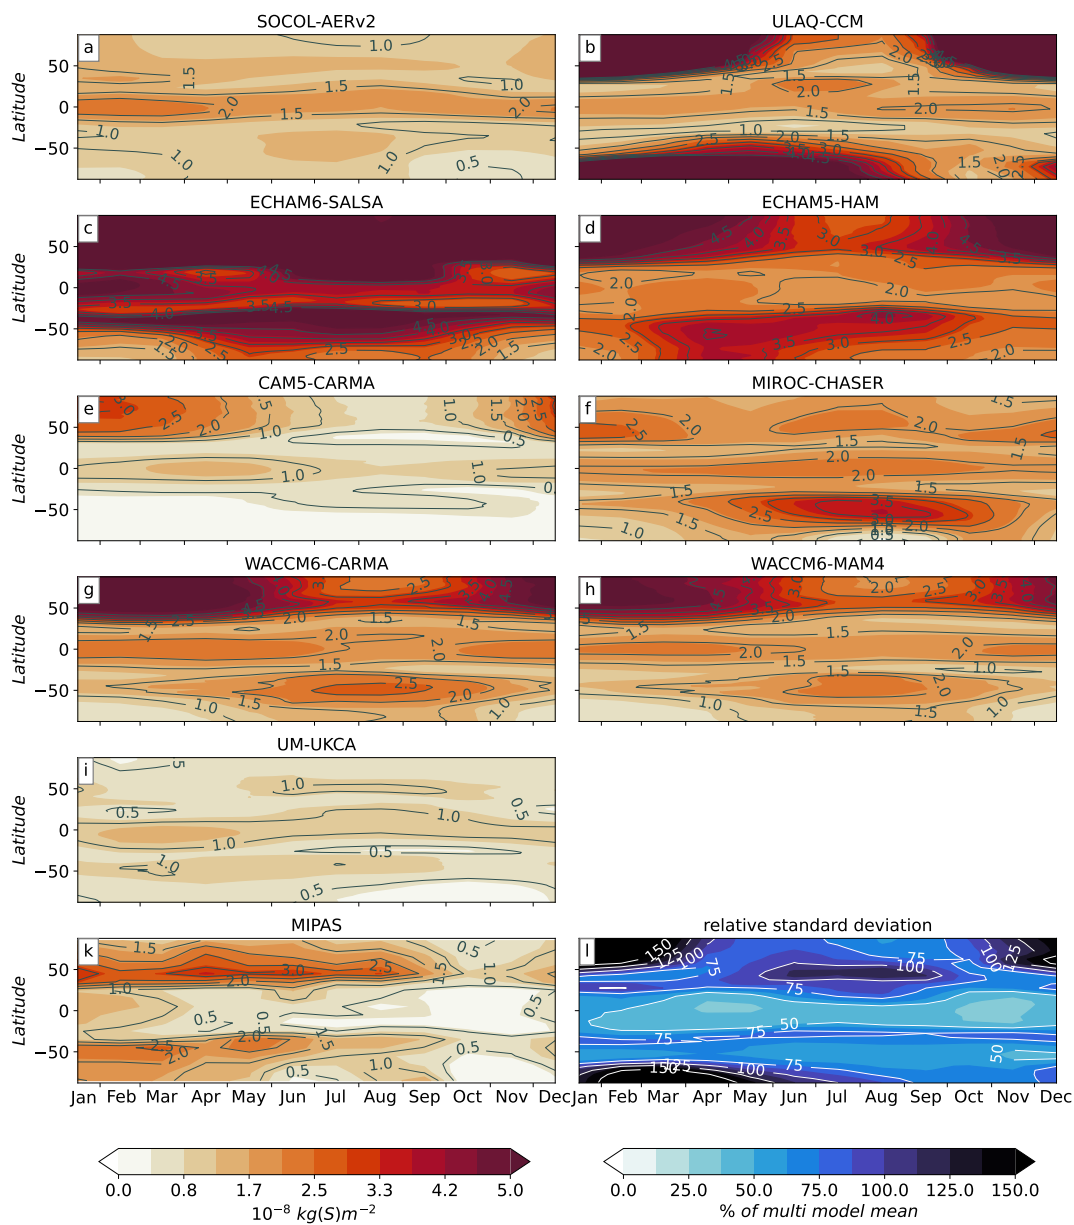

**Figure 8.** The stratospheric SO<sub>2</sub> burden in kg m<sup>-2</sup> for all models in (a-i), MIPAS in (k) and the multi-model RSD in (l). See also Fig. 5.



in this area, as shown in Fig. A4 (a-f). In REF, more SO<sub>2</sub> is transported to the stratosphere in many models. In ULAQ-CCM, WACCM6-CARMA, and WACCM6-MAM4 for example, the lowermost stratospheric SO<sub>2</sub> mixing ratio is increased by 50%  
625 to up to 80% due to anthropogenic emissions. In contrast, in ECHAM5-HAM and MIROC-CHASER, most of these emissions do not reach the stratosphere. This then results in the inter-hemispheric asymmetry between the models in terms of the lower stratospheric SO<sub>2</sub>.

Although MIPAS (k) has a distribution more similar to e.g. ECHAM6-SALSA than the models with lower stratospheric SO<sub>2</sub> burdens, the values in Fig. 1 are closer to e.g. SOCOL-AERv2. However, as the MIPAS dataset only extends to 23km,  
630 not considering large parts of the stratosphere, we cannot make a definitive statement about the stratospheric mass of SO<sub>2</sub> in the MIPAS dataset. In the stratosphere, most models have a secondary maximum of SO<sub>2</sub> in the tropical region between about 10-20 hPa. This can be attributed to the photolysis of OCS, discussed in the previous section, as well as to the evaporation of aerosol and subsequent photolysis of H<sub>2</sub>SO<sub>4</sub> (Turco et al., 1979). As ECHAM6-SALSA does not include OCS, SO<sub>2</sub> only resides in the lower stratosphere. The other extreme is seen in ECHAM5-HAM, where too little SO<sub>2</sub> may be oxidized due to  
635 low OH concentrations (see Sect. 3.2). Therefore the lifetime of SO<sub>2</sub> increases, and there is more of it available to be further transported toward the poles from the tropics. The RSD in (l) is the highest in the UTLS and in the northern extratropical troposphere, indicating low agreement among models in these regions. Models agree the most in the free tropical troposphere and the lower tropical stratosphere. Above 30 hPa, the RSD again increases, indicating differences in how models behave at the upper edge of the Junge layer both in terms of microphysics and photolysis.

640 Fig. 8 shows the stratospheric SO<sub>2</sub> burden distributions. As for OCS in Fig. 5 and 6, the models follow a similar seasonal pattern, where the tropical region can be clearly distinguished from the extratropics. However, for SO<sub>2</sub>, the lowest burdens are not found in the tropical region for all models. Instead, in CAM5-CARMA, the southern hemisphere has lower burdens, while in most other models, these lower burdens are mainly seen in polar summer (except for ULAQ-CCM and UM-UKCA). Lower burdens are seen in the southern hemisphere for most models, though still often exceeding the tropical burdens for several  
645 months, as in ECHAM5-HAM, WACCM6-MAM4, WACCM6-CARMA, and MIROC-CHASER. As described above, the higher burdens in ECHAM5-HAM, ECHAM6-SALSA, and ULAQ-CCM are found in the extratropical region. In WACCM6-CARMA and WACCM6-MAM, whose stratospheric SO<sub>2</sub> burdens were in the middle range, only the northern hemisphere is characterized by higher burdens. While the higher SO<sub>2</sub> burdens in ECHAM5-HAM were previously explained by lower OH burdens, the higher SO<sub>2</sub> burdens in ECHAM6-SALSA and ULAQ-CCM can now be explained by increased transport across  
650 the tropopause in the northern subtropical region. While the differences among models are considerable, the best agreement outside the tropics is found from November to December at southern high latitudes (Fig. 8 (l)).

### 3.4 SAD and effective radius

Fig. 9 shows the simulated effective radius in (a) and (d), surface area density (SAD, (b) and (e)) as well as extinction in the tropics in (c), averaged over the whole time period; for the first two aerosol variables, values measured at Laramie, Wyoming  
655 (41° N, 105° W) are also shown. In the models, the closest grid box to Laramie was selected for comparison to the balloon observations. The effective radius in Fig. 9 (a) increase above 100 hPa and reach a maximum at around 20-30 hPa, ranging



from about 0.12  $\mu\text{m}$  in UM-UKCA to 0.22  $\mu\text{m}$  (ULAQ-CCM). At Laramie, this maximum is found at slightly lower altitudes at 40-60 hPa in all models except ECHAM6-SALSA and ULAQ-CCM. While ULAQ-CCM and UM-UKCA are still outliers, all other models are closer together in this region in terms of their effective radius. In Sect. 3.2, we suggest that the size distribution is the cause of differences in AOD between WACCM6-CARMA and WACCM6-MAM4, despite very similar burdens. Fig. 9 confirms that the effective radius is larger in WACCM6-MAM4 (below ca. 15 hPa), while its extinction is lower than in WACCM6-CARMA. This is also seen at Laramie in panel (d), although to a lesser extent. The SAGE II derived data indicate a smaller effective radius than in the models, except for MIROC-CHASER at this altitude while exceeding the models' effective radius at lower levels. However, we have to stress that Quaglia et al. (2023) did not use the SAGE II data below 21 km (or ca. 50 hPa), due to lower quality of the data at lower altitudes. Additionally, when the aerosol is low, particularly in background conditions, the SAGE II derived data and optical particle counters deviate significantly from each other (Kovilakam and Deshler, 2015). When comparing to the OPC measurements at Laramie, we also see a much better agreement with the models than with the SAGE II data in the tropical region. Quaglia et al. (2023) showed a distribution of effective radii in the pre-Pinatubo quiet conditions ranging from 0.1  $\mu\text{m}$  in SOCOL-AERv2 to 0.17  $\mu\text{m}$  in ECHAM6-SALSA and 0.27  $\mu\text{m}$  in ULAQ-CCM. In our study, however, ECHAM6-SALSA has the smallest effective radius out of these three models. In direct comparison with the volcanically perturbed values in Quaglia et al. (2023), we see that the maximum effective radius is reduced to about half during these quiet conditions.

**Surface area density (SAD)** is marked by a larger disagreement between the models, reflecting the differences among burdens described in Sect. 3.1. At 70 hPa, SOCOL-AERv2, ULAQ-CCM, WACCM6-MAM4 and MIROC-CHASER are closest to the observation derived data by SAGE II, although the latter shows a sharper decrease towards 60 hPa, where WACCM6-CARMA, WACCM6-MAM4, and CAM5-CARMA are closer. Again, more models are closer to the OPC observations in mid-latitudes in panel (e) than to observations in panel (b). In panel (b) SAD in CAM5-CARMA, and WACCM6-MAM decreases rapidly around 80 hPa, consistent with lower aerosol burdens in the upper tropical troposphere. In CAM5-CARMA, the SAD decreases to 0, as this variable is not defined below the tropopause.

Differences among models are again very large, both concerning the altitude and magnitude of the maximum extinction in the stratosphere (see Fig. 9 panel (c)). While in CAM5-CARMA, the maximum extinction is slightly below the tropopause (at ca 100 hPa), is above the tropopause for most other models. In MIROC-CHASER again, the stratospheric values are very low throughout and only increase in the troposphere. The largest stratospheric extinction coefficients are seen in ECHAM6-SALSA, which is consistent with the higher burdens in this model, followed by SOCOL-AERv2 and ULAQ-CCM. CAM5-CARMA and both WACCM6 models have mid-range values, consistent with GloSSACV2.2, while ECHAM5-HAM has the lowest extinctions, also consistent with its overall aerosol burdens. In Quaglia et al. (2023), the extinction coefficients also vary a lot among models for volcanically perturbed conditions.

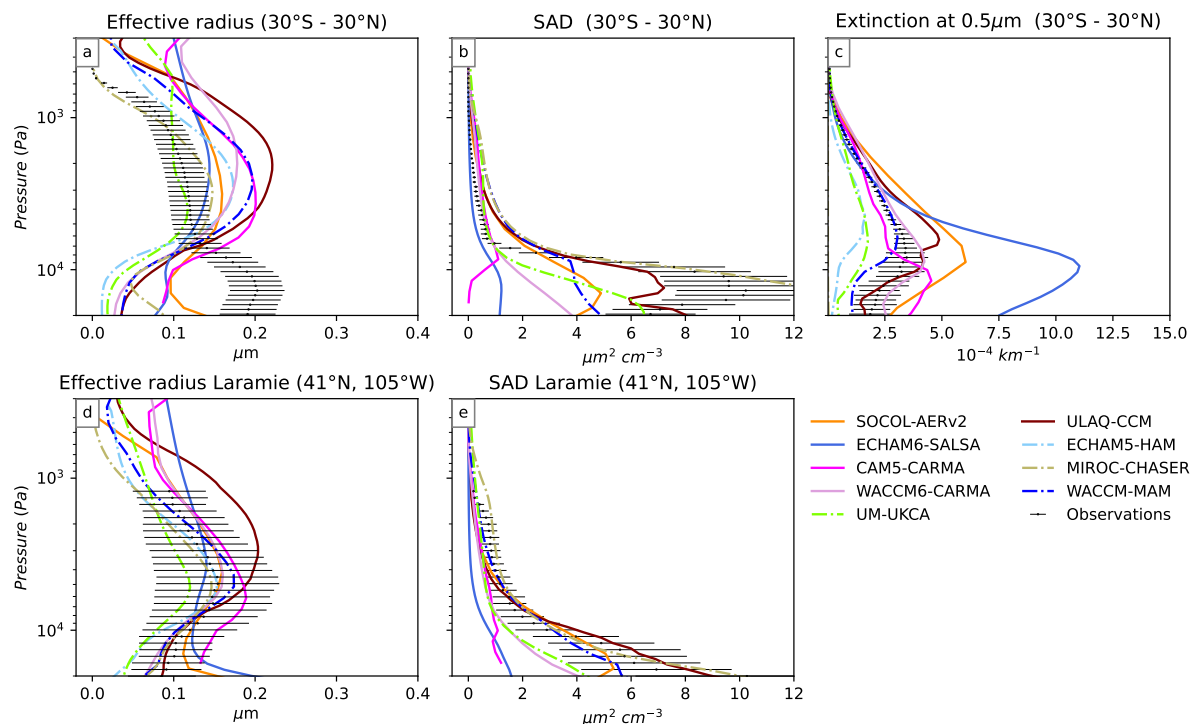

**Figure 9.** The effective radius, SAD, and extinction for each model in the tropical region (30° S to 30° N) and in a single grid cell at Laramie (41° N, 105° W). Additionally, we show the effective radius and surface area density for SAGE II (observations in panels (a) and (b) and the extinction from GloSSACV2.2 in panel (c). Observations in panels (d) and (e) are derived from OPC measurements. Models with sectional aerosol schemes are shown as solid lines, while modal aerosol schemes as dash-dotted lines. Extinction in SOCOL-AERv2, ULAQ-CCM, and MIROC-CHASER is at 525nm, in CAM5-CARMA at 532 nm, in ECHAM6-SALSA at 533 nm and in ECHAM5-HAM, WACCM6-CARMA, WACCM6-MAM4, and UM-UKCA at 550 nm. We use the effective radius of pure sulfate for SOCOL-AERv2 and ULAQ-CCM, an SAD weighted average of pure sulfate and mixed aerosol effective radius for CAM5-CARMA and WACCM6-CARMA and the effective radius of all aerosol for ECHAM6-SALSA, ECHAM5-HAM, WACCM6-MAM4, and MIROC-CHASER. SAD describes only pure sulfate in SOCOL-AERv2, ULAQ-CCM, and CAM5-CARMA, while it encompasses all aerosol in ECHAM6-SALSA, ECHAM5-HAM, WACCM6-MAM4 and MIROC-CHASER. In WACCM6-CARMA, SAD is summed up for pure sulfate and mixed aerosol. Extinction of pure sulfate is used in SOCOL-AERv2 and ULAQ while it is summed up for pure sulfate and mixed aerosol in WACCM6-CARMA and all remaining models, it is the total extinction.

## 4 Conclusions

In this study, we present an analysis of the atmospheric sulfur budget by using nine state-of-the-art global circulation models with interactive aerosol modules and sulfur chemistry. In particular, we showcase the burdens of the main sulfur species represented in these models (OCS, sulfate aerosols, and SO<sub>2</sub>), as well as their latitudinal and vertical distribution and seasonal variability. Emission and deposition fluxes are also discussed. Sulfate aerosol, OCS, and SO<sub>2</sub> behave very differently in the



atmosphere, providing insight into the modeled processes. OCS is almost chemically inert in the troposphere and is primarily influenced by transport mechanisms, but undergoes photolysis in the stratosphere. Conversely, SO<sub>2</sub>, which has a lifetime of a few days to a few weeks is more responsive to chemical processes also in the troposphere.

Previous studies have revealed the main sulfur species abundant in the atmosphere to be OCS, SO<sub>2</sub>, and sulfate aerosol, which we here find to make up about 95% of the total tropospheric and 98% of the stratospheric sulfur mass, averaging over all models which include these three species. However, variability across models in the stratospheric burden of each of these main species is large, with burdens of  $319 \pm 50$  Gg (S) for OCS,  $12 \pm 7$  Gg (S) for SO<sub>2</sub>, and  $156 \pm 51$  Gg (S) for sulfate aerosol. Anthropogenic emissions of SO<sub>2</sub> dominate the sulfate aerosol burden in the troposphere of the Northern Hemisphere and increase the aerosol mass in the lowermost stratosphere by 10-80%, which is very model dependent. Southern Hemisphere, both in the troposphere and the stratosphere, is less affected by anthropogenic activity (10-30%). The total deposition varies across models by about a factor of two between  $99692$  Gg(S)yr<sup>-1</sup> and  $51211$  Gg(S)<sup>-1</sup> (or  $86693 \pm 18115$  Gg(S)<sup>-1</sup>). Models disagree also on the form in which sulfur is deposited, as well as the split between wet and dry deposition. More sulfur being deposited as aerosol precursor gases could lead to a lower aerosol burden, as discussed by Textor et al. (2006). We do, however, not explicitly observe such behavior. Further, the relative importance of wet and dry deposition is expected to depend on the solubility of the compound, as well as the treatment of clouds and precipitation in the respective models. Evaluating model performances with respect to clouds and precipitation is beyond the scope of this study, and we refer to each model documentation for details as well as to dedicated model intercomparison activities on this topic (e.g., Webb et al., 2017).

In terms of the spatial distribution, the models agree very well on the distribution and seasonality in the southern hemisphere for all species. However, in the northern hemisphere, where anthropogenic emissions contribute significantly to the aerosol burden, especially at low to mid-latitudes, more uncertainties persist. This is in part due to dynamical uncertainties in the northern polar vortex (Karpechko et al., 2022), affecting the transport into high latitudes. The highest values in the northern extratropics are seen in ULAQ-CCM, which are associated with a slower and warmer vortex compared to the other models. Additionally, resolution-dependent isentropic transport through the subtropical tropopause (Holton et al., 1995; Gettelman et al., 2011) could play a major role in increasing the extratropical burdens of OCS and sulfate in some models, which may be even more pronounced during the Asian monsoon, where aerosol transport to the stratosphere is facilitated (Yu et al., 2017). A low horizontal resolution also increases diffusion across transport barriers, such as the polar vortex or the tropopause, where it crosses the isentropes in the subtropics (Dietmüller et al., 2018). Speed of the BDC also could be a major factor of uncertainty (Abalos et al., 2021), affecting both the transport through the shallow branch as well as upwelling and thus the confinement of aerosol, in the tropics. Idealized tracer experiments using SO<sub>2</sub> emissions might help to isolate the dynamical biases.

The analysis on the effective radius, SAD, and extinction in the tropics and at Laramie reveals notable differences among models. While the effective radius shows some agreement among models and is within the uncertainty of OPC measurements in Laramie in all models, SAD exhibits larger discrepancies, reflecting the variations in aerosol burdens. Extinction levels also vary significantly with ECHAM6-SALSA showing the highest values. Elaborating further on the reasons for the size distribution uncertainties would require a closer look at the individual microphysical processes, as was also highlighted by Quaglia et al. (2023), but such data were not available by most of the models in our study. Recently, concerns have arisen regarding





730 nucleation schemes such as Vehkamäki et al. (2002), which may overestimate the nucleation of new particles (Laakso et al., 2022; Yu et al., 2023). However, these studies focus on stratospheric aerosol injection scenarios, where sulfur is much more abundant than in the background conditions presented in this study. Using observational data, Wrana et al. (2023) showed that small volcanic eruptions affect the background size distribution of aerosols in unexpected ways, sometimes decreasing instead of increasing the effective radius. The volcanic events highlighted there can be further used as model test cases, contributing knowledge to the model performance in terms of microphysics and its dependence on the background conditions.

735 With this study, we have provided a first analysis of the background burdens of sulfur in atmospheric models. We mainly assessed the burdens, latitudinal and vertical distributions of sulfur species, allowing us to identify potential reasons for model diversity. As burdens are merely the result of fluxes, the next step would be to compare chemical and microphysical fluxes, as well as emission, cross-tropopause, and deposition fluxes. For SO<sub>2</sub> in particular, cross-tropopause fluxes in the mid-latitudes have the potential to provide more insight into the underlying processes causing differences in stratospheric burdens.

740 Overall, this study sheds new light on the atmospheric sulfur budget and, for the first time, presents it in a multi-model context. Our results highlight the importance of an interplay between the chemical, microphysical, and dynamical processes in atmospheric models. The interdependence of these processes complicates the attribution of biases when looking only at their final products, namely the distribution and variability of sulfur species in the atmosphere. The same holds true for the recent similar studies focused on volcanic events (e.g. Quaglia et al., 2023; Clyne et al., 2021; Marshall et al., 2018) and stratospheric aerosol injections (e.g. Weisenstein et al., 2022). Some conclusions could be made by relating different variables to each other, 745 however more detailed investigations of the reasons for inter-model disagreement would require process oriented experiments, e.g. the PoEMS sensitivity experiments suggested by ISA-MIP for the Pinatubo eruption (e.g. Timmreck et al., 2018), and/or the comparison of stand-alone parts of respective model codes, i.e box versions of the microphysical and chemical schemes, short-wave and long-wave radiative transfer modules, and treatment of the Mie calculation.

*Data availability.* The data will be made available for the final publication



750 **Appendix A**

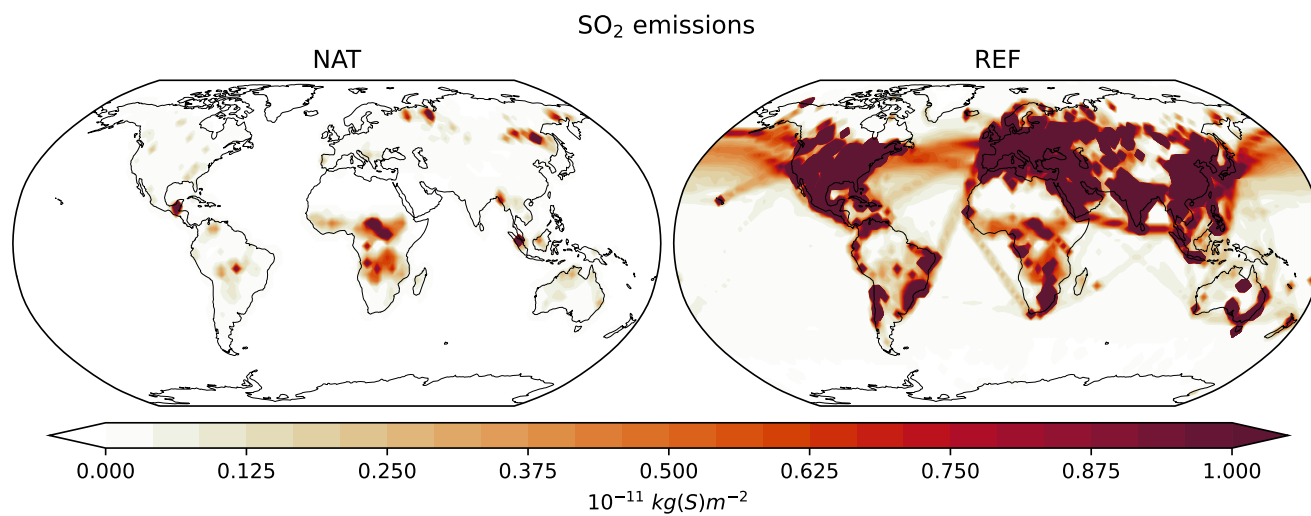

**Figure A1.** The SO<sub>2</sub> emissions from the MACC-CITY inventory for the NAT experiments without anthropogenic emissions on the left, and the REF experiment with anthropogenic emissions on the right.

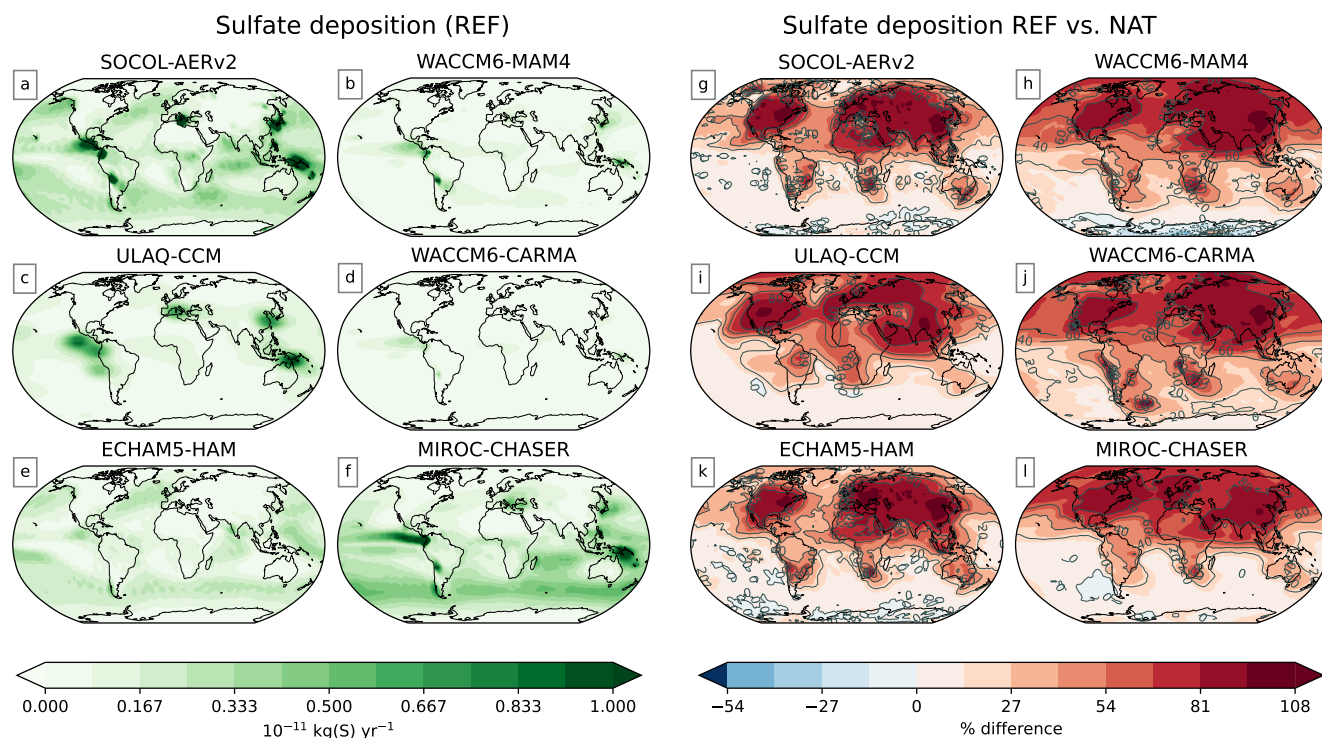

**Figure A2.** Total deposition fluxes of sulfate aerosol (as a sum of dry and wet deposition) as absolute values are given in (a-f), and as a percent difference between the REF and NAT experiments in (g-l). The percent difference is calculated as  $\text{REF-NAT}$ , and divided by REF. The data are a time average over the whole time period.

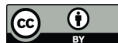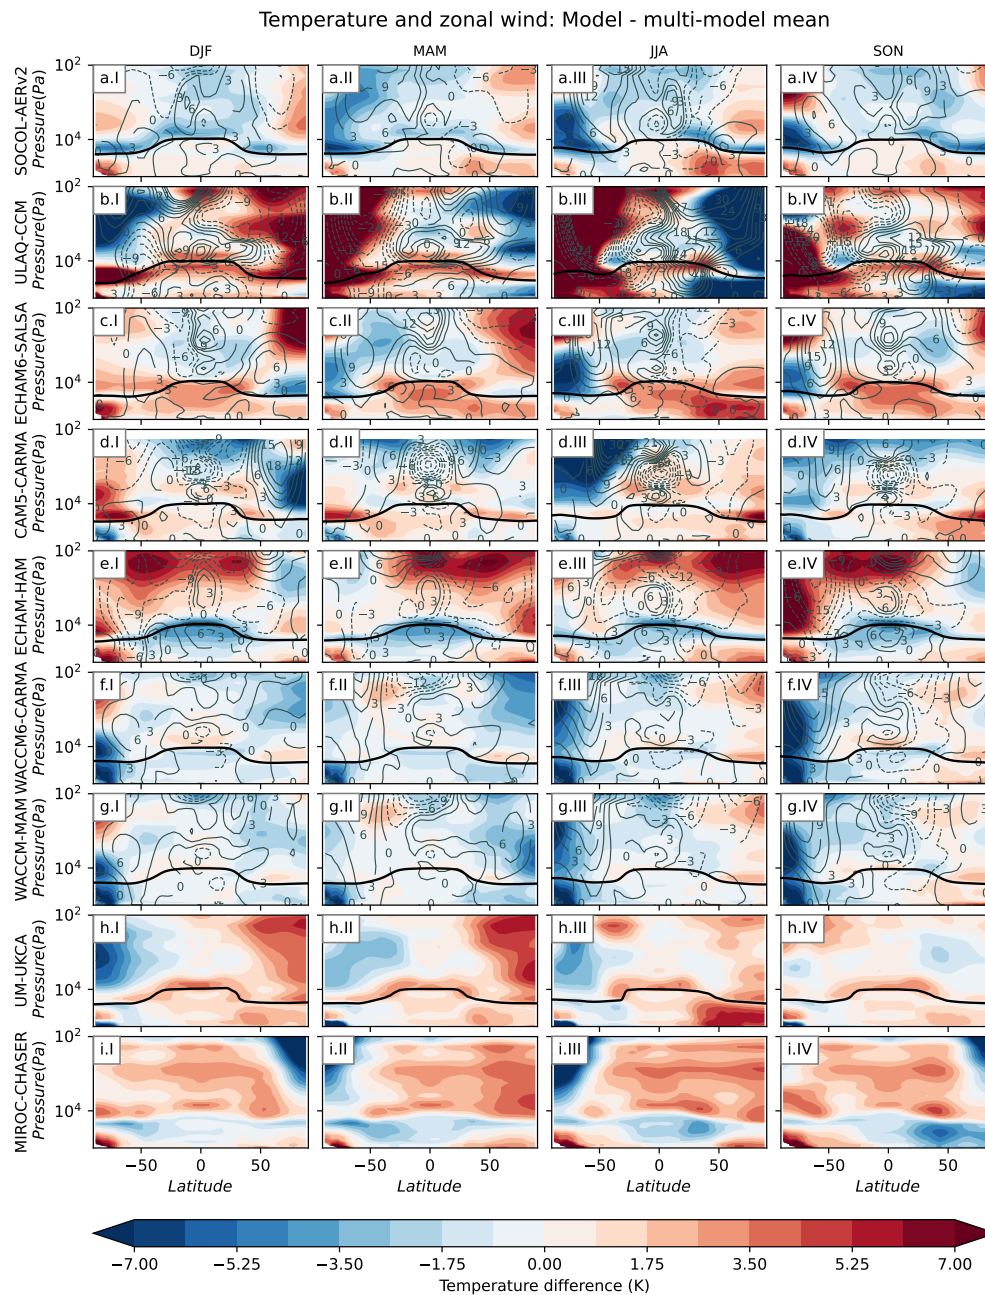

**Figure A3.** Depicted is the difference of the time-slice simulations, averaged over 20 years for each season for temperature and zonal winds. All data were gridded to a  $5^\circ \times 5^\circ$  grid and to 39 pressure levels. Anomalies are calculated with respect to the multimodel mean. Temperature is shown in color, while winds are in gray contours. Solid lines indicate stronger than observed westerly zonal winds, while dashed lines are weaker than observed. The numbers along with the contours are the anomalies in  $\text{m s}^{-1}$ . Each column represents one season, while each row represents one model. The simulated tropopause is shown as a black line, also averaged over each season respectively.

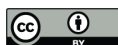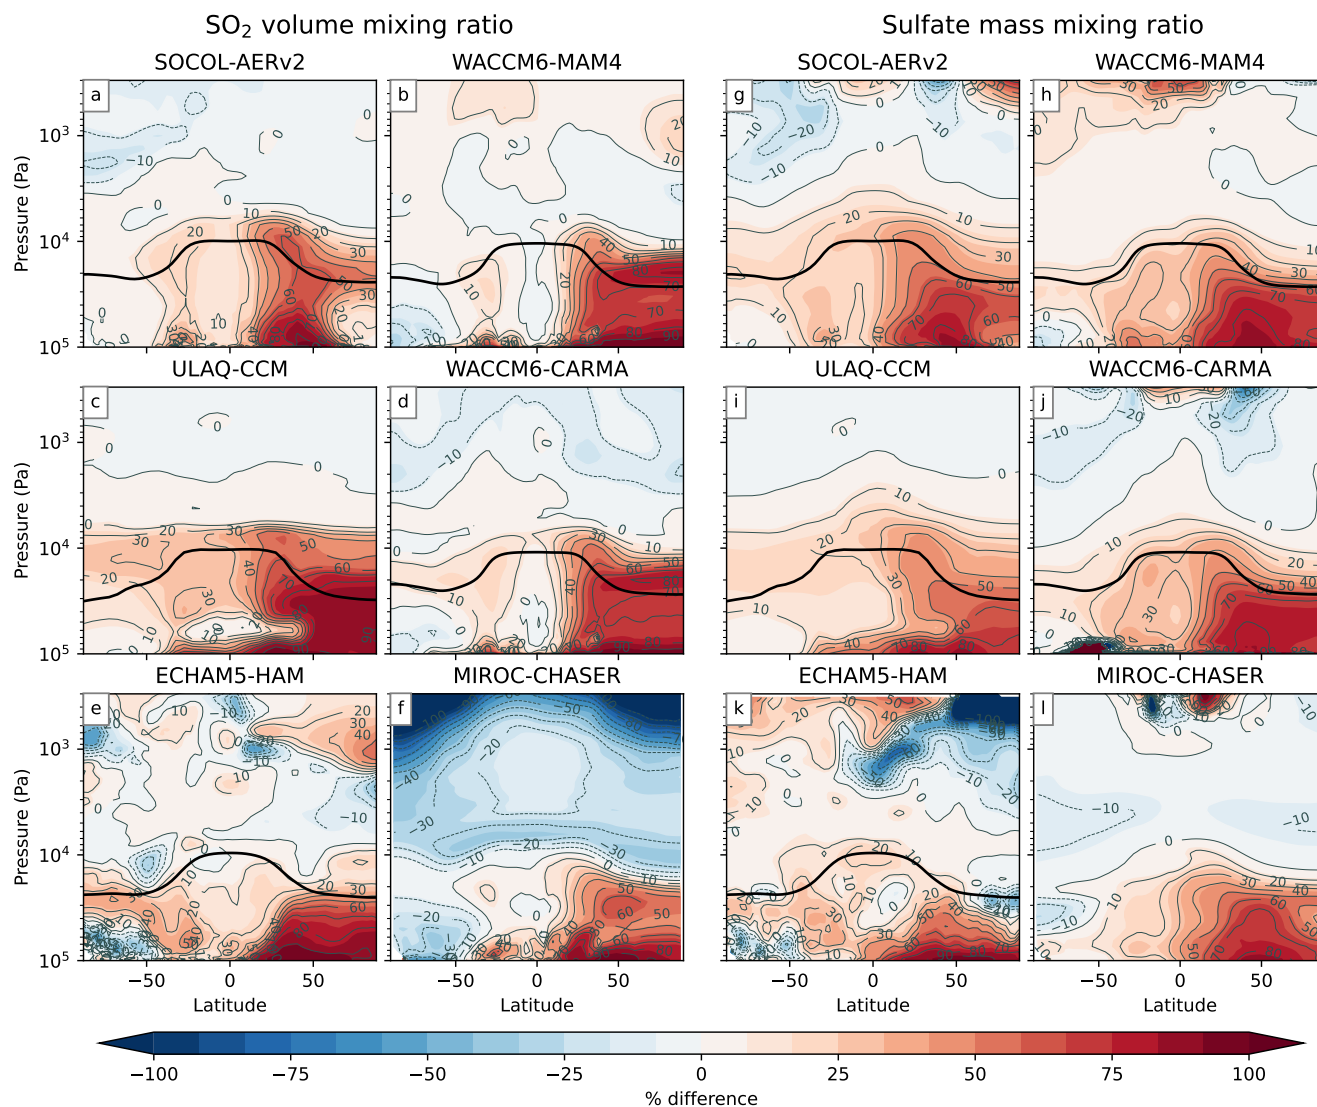

**Figure A4.** The percent difference between the REF experiment and the NAT experiment of the SO<sub>2</sub> volume mixing ratio in (a-f) and the sulfate mass mixing ratio in (g-l). The percent difference is calculated as  $\frac{\text{REF}-\text{NAT}}{\text{REF}}$ . All data are zonally averaged and over the whole time period of each simulation.



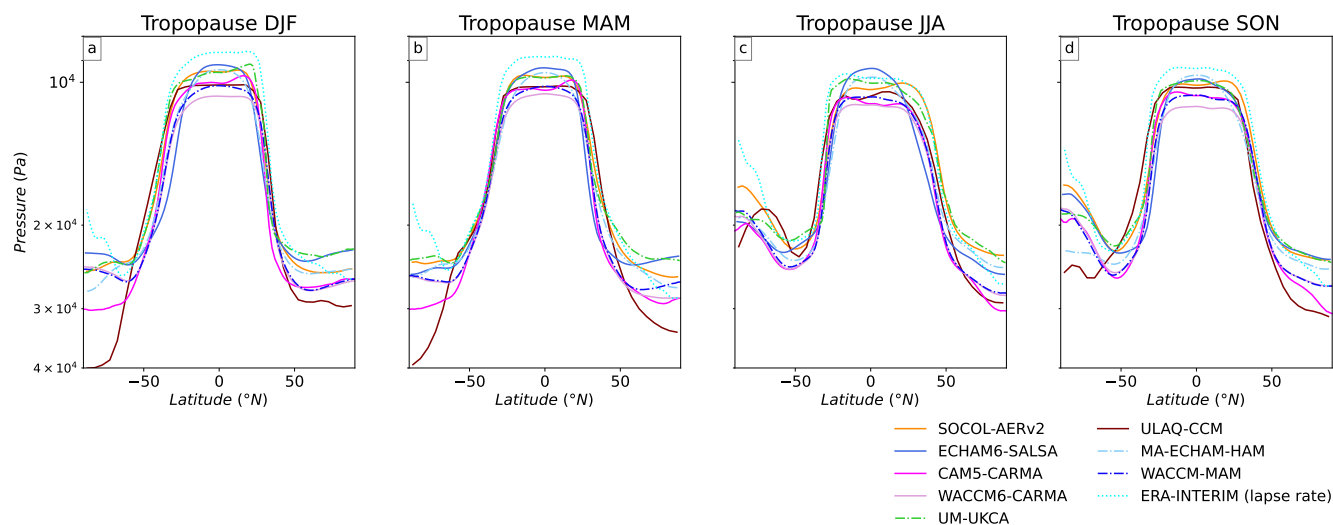

**Figure A5.** The tropopauses of each model as well as the ERA-INTERIM derived tropopause which was used to calculate stratospheric burdens for SAGE-3 $\lambda$ .

*Author contributions.* The analysis and the main text were done by CB and contributions were also made by TSu, AL, GM, UN, CT, IQ, ST, DV, PY, YZ, and TP. TSu, TP, GC, and VA supervised CB. CT, SD, and GM conceptualized the study. The simulations were run by CB, AL, GM, UN, IQ, TSe, DV, PY, and YZ. All authors contributed to the discussion of the results and the manuscript corrections.

*Competing interests.* Some authors are members of the editorial board of Atmospheric Chemistry and Physics.

755 *Acknowledgements.* This work is a contribution to the “Interactive Model Intercomparison Project (ISAMIP)” from the WCRP/SPARC activity “Stratospheric Sulfur and its Role in Climate (SSiRC). CT and UN acknowledge support by the Deutsche Forschungsgemeinschaft (DFG) Research Unit VolImpact (FOR2820, grant: 398006378) within the projects VolARC and VolClim. ECHAM5-HAM computations and analysis were performed on the computer of the Deutsches Klima Rechenzentrum (DKRZ) using resources granted by its Scientific Steering Committee (WLA) under project ID bm0885. Y.Z. acknowledges funding from NOAA’s Earth Radiation Budget (ERB) Initiative  
760 (CPO # 03-01-07-001), and NOAA cooperative agreements NA17OAR4320101 and NA22OAR4320151. NCAR’s Community Earth System Model project is supported primarily by the National Science Foundation. Computing and data storage resources, including the Cheyenne supercomputer (doi:10.5065/D6RX99HX), were provided by the Computational and Information Systems Laboratory (CISL) at NCAR. TSu, ER, and CB thank the Swiss National Science Foundation for supporting this study through the Nr. 200020-182239 project POLE (Polar Ozone Layer Evolution). TSu also acknowledges the support from the Karcher Fonds, Graubünden, Switzerland. GC thanks the



<https://doi.org/10.5194/egusphere-2023-1655>

Preprint. Discussion started: 28 August 2023

© Author(s) 2023. CC BY 4.0 License.

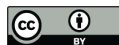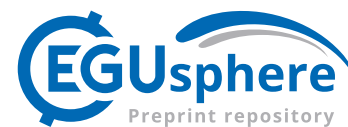

765 Swiss National Science Foundation for support via the Ambizione Grant ref no. PZ00P2\_180043. SV was funded via the ETH Research Grant no. ETH-17 19-2. SOCOL-AERv2 simulations have been performed at the ETH cluster EULER.



## References

- Abalos, M., Calvo, N., Benito-Barca, S., Garny, H., Hardiman, S. C., Lin, P., Andrews, M. B., Butchart, N., Garcia, R., Orbe, C., Saint-Martin, D., Watanabe, S., and Yoshida, K.: The Brewer–Dobson circulation in CMIP6, *Atmos. Chem. Phys.*, 21, 13 571–13 591, 770 <https://doi.org/10.5194/acp-21-13571-2021>, 2021.
- Abraham, N.: Documentation for the vn8.4 GA4.0 CheST+GLOMAP-mode release job RJ4.0, UK Chemistry and Aerosol project, [https://www.ukca.ac.uk/wiki/index.php/Release\\_Job\\_RJ4.0](https://www.ukca.ac.uk/wiki/index.php/Release_Job_RJ4.0), 2014.
- Abraham, N., Archibald, A. T., Bellouin, N., Boucher, O., Braesicke, P., Bushell, A., Carslaw, K. S., Collins, W., Dalvi, M., Emmerson, K., and Others: Unified Model Documentation Paper No. 84: United Kingdom Chemistry and Aerosol (UKCA) Technical Description MetUM Version 8.4, UK Met Office, Exeter, UK, [https://www.ukca.ac.uk/images/b/b1/Umdp\\_084-umdp84.pdf](https://www.ukca.ac.uk/images/b/b1/Umdp_084-umdp84.pdf), 2012. 775
- Andersson, S. M., Martinsson, B. G., Vernier, J.-P., Friberg, J., Brennmeijer, C. A. M., Hermann, M., van Velthoven, P. F. J., and Zahn, A.: Significant radiative impact of volcanic aerosol in the lowermost stratosphere, *Nat Commun*, 6, 7692, <https://doi.org/10.1038/ncomms8692>, 2015.
- Andres, R. and Kasgnoc, A.: A time-averaged inventory of subaerial volcanic sulfur emissions, *J. Geophys. Res.*, 103, 25 251–25 261, 780 <https://doi.org/10.1029/98JD02091>, 1998.
- Aquila, V., Oman, L. D., Stolarski, R., Douglass, A. R., and Newman, P. A.: The Response of Ozone and Nitrogen Dioxide to the Eruption of Mt. Pinatubo at Southern and Northern Midlatitudes, *J. Atmos. Sci.*, 70, 894 – 900, <https://doi.org/10.1175/JAS-D-12-0143.1>, 2013.
- Aubry, T. J., Staunton-Sykes, J., Marshall, L. R., Haywood, J., Abraham, N. L., and Schmidt, A.: Climate change modulates the stratospheric volcanic sulfate aerosol lifecycle and radiative forcing from tropical eruptions, *Nat. Commun.*, 12, 4708, <https://doi.org/10.1038/s41467-021-24943-7>, 2021. 785
- Ayers, G. P., Gillett, R. W., and Gras, J. L.: On the vapor pressure of sulfuric acid, *Geophys. Res. Lett.*, 7, 433–436, <https://doi.org/10.1029/GL007i006p00433>, 1980.
- Baldwin, M. P., Gray, L. J., Dunkerton, T. J., Hamilton, K., Haynes, P. H., Randel, W. J., Holton, J. R., Alexander, M. J., Hirota, I., Horinouchi, T., Jones, D. B. A., Kinnerson, J. S., Marquardt, C., Sato, K., and Takahashi, M.: The quasi-biennial oscillation, *Reviews of Geophysics*, 790 39, 179–229, <https://doi.org/10.1029/1999RG000073>, 2001.
- Barkley, M. P., Palmer, P. I., Boone, C. D., Bernath, P. F., and Sutharalingam, P.: Global distributions of carbonyl sulfide in the upper troposphere and stratosphere, *Geophys. Res. Lett.*, 35, <https://doi.org/10.1029/2008GL034270>, 2008.
- Bates, T. S., Lamb, B. K., Guenther, A., Dignon, J., and Stoiber, R. E.: Sulfur emissions to the atmosphere from natural sources, *J. Atmos. Chem.*, 14, 315–337, <https://doi.org/10.1007/BF00115242>, 1992.
- 795 Bellouin, N., Mann, G. W., Woodhouse, M. T., Johnson, C., Carslaw, K. S., and Dalvi, M.: Impact of the modal aerosol scheme GLOMAP-mode on aerosol forcing in the Hadley Centre Global Environmental Model, *Atmos. Chem. Phys.*, 13, 3027–3044, <https://doi.org/10.5194/acp-13-3027-2013>, 2013.
- Bergman, T., Kerminen, V.-M., Korhonen, H., Lehtinen, K. J., Makkonen, R., Arola, A., Mielonen, T., Romakkaniemi, S., Kulmala, M., and Kokkola, H.: Evaluation of the sectional aerosol microphysics module SALSA implementation in ECHAM5-HAM aerosol-climate 800 model, *Geosci. Model Dev.*, 5, 845–868, <https://doi.org/10.5194/gmd-5-845-2012>, 2012.
- Brasseur, G. P. and Solomon, S.: *Aeronomy of the Middle Atmosphere : Chemistry and Physics of the Stratosphere and Mesosphere*, pp. 273–311, Dordrecht : Springer, 2006.



- Brodowsky, C., Sukhodolov, T., Feinberg, A., Höpfner, M., Peter, T., Stenke, A., and Rozanov, E.: Modeling the Sulfate Aerosol Evolution After Recent Moderate Volcanic Activity, 2008–2012, *J. Geophys. Res.*, 126, <https://doi.org/10.1029/2021JD035472>, 2021.
- 805 Brooke, J. S. A., Feng, W., Carrillo-Sanchez, J. D., Mann, G. W., James, A. D., Bardeen, C. G., Marshall, L., Dhomse, S. S., and Plane, J. M. C.: Meteoric Smoke Deposition in the Polar Regions: A Comparison of Measurements With Global Atmospheric Models, *J. Geophys. Res.*, 122, 11111–112130, <https://doi.org/10.1002/2017JD027143>, 2017.
- Brühl, C., Lelieveld, J., Crutzen, P. J., and Tost, H.: The role of carbonyl sulphide as a source of stratospheric sulphate aerosol and its impact on climate, *Atmos. Chem. Phys.*, 12, 1239–1253, <https://doi.org/10.5194/acp-12-1239-2012>, 2012.
- 810 Butchart, N.: The Brewer-Dobson circulation, *Rev. Geophys.*, 52, 157–184, <https://doi.org/10.1002/2013RG000448>, 2014.
- Carn, S.: Multi-Satellite Volcanic Sulfur Dioxide L4 Long-Term Global Database V4, Greenbelt, MD, USA, Goddard Earth Science Data and Information Services Center (GES DISC), <https://doi.org/10.5067/MEASURES/SO2/DATA405>, accessed: [3/15/2023], 2022.
- Chen, Q., Sherwen, T., Evans, M., and Alexander, B.: DMS oxidation and sulfur aerosol formation in the marine troposphere: a focus on reactive halogen and multiphase chemistry, *Atmos. Chem. Phys.*, 18, 13617–13637, <https://doi.org/10.5194/acp-18-13617-2018>, 2018.
- 815 Chim, M. M., Aubry, T. J., Abraham, N. L., Marshall, L., Mulcahy, J., Walton, J., and Schmidt, A.: Climate Projections Very Likely Underestimate Future Volcanic Forcing and Its Climatic Effects, *Geophys. Res. Lett.*, 50, e2023GL103743, <https://doi.org/https://doi.org/10.1029/2023GL103743>, e2023GL103743 2023GL103743, 2023.
- Clyne, M., Lamarque, J.-F., Mills, M. J., Khodri, M., Ball, W., Bekki, S., Dhomse, S. S., Lebas, N., Mann, G., Marshall, L., Niemeier, U., Poulain, V., Robock, A., Rozanov, E., Schmidt, A., Stenke, A., Sukhodolov, T., Timmreck, C., Toohey, M., Tummon, F., Zanchettin, D., Zhu, Y., and Toon, O. B.: Model physics and chemistry causing intermodel disagreement within the VolMIP-Tambora Interactive Stratospheric Aerosol ensemble, *Atmos. Chem. Phys.*, 21, 3317–3343, <https://doi.org/10.5194/acp-21-3317-2021>, 2021.
- 820 Crutzen, P. J.: The possible importance of CSO for the sulfate layer of the stratosphere, *Geophys. Res. Lett.*, 3, 73–76, <https://doi.org/10.1029/GL003i002p00073>, 1976.
- Crutzen, P. J.: Albedo Enhancement by Stratospheric Sulfur Injections: A Contribution to Resolve a Policy Dilemma?, *Climatic Change*, pp. 3539–3561, <https://doi.org/10.1007/s10584-006-9101-y>, 2006.
- 825 DallaSanta, K., Gerber, E. P., and Toohey, M.: The Circulation Response to Volcanic Eruptions: The Key Roles of Stratospheric Warming and Eddy Interactions, *Journal of Climate*, 32, 1101–1120, <https://doi.org/10.1175/JCLI-D-18-0099.1>, 2019.
- Damadeo, R. P., Zawodny, J. M., Thomason, L. W., and Iyer, N.: SAGE version 7.0 algorithm: application to SAGE II, *Atmos. Meas. Tech.*, 6, 3539–3561, <https://doi.org/10.5194/amt-6-3539-2013>, 2013.
- 830 Danabasoglu, G., Lamarque, J.-F., Bacmeister, J., Bailey, D. A., DuVivier, A. K., Edwards, J., Emmons, L. K., Fasullo, J., Garcia, R., Gettelman, A., Hannay, C., Holland, M. M., Large, W. G., Lauritzen, P. H., Lawrence, D. M., Lenaerts, J. T. M., Lindsay, K., Lipscomb, W. H., Mills, M. J., Neale, R., Oleson, K. W., Otto-Bliesner, B., Phillips, A. S., Sacks, W., Tilmes, S., van Kampenhout, L., Versteijn, M., Bertini, A., Dennis, J., Deser, C., Fischer, C., Fox-Kemper, B., Kay, J. E., Kinnison, D., Kushner, P. J., Larson, V. E., Long, M. C., Mickelson, S., Moore, J. K., Nienhouse, E., Polvani, L., Rasch, P. J., and Strand, W. G.: The Community Earth System Model Version 2 (CESM2), *J. Adv. Model. Earth Syst.*, 12, e2019MS001916, <https://doi.org/10.1029/2019MS001916>, 2020.
- 835 Dee, D. P., Uppala, S. M., Simmons, A. J., Berrisford, P., Poli, P., Kobayashi, S., Andrae, U., Balmaseda, M. A., Balsamo, G., Bauer, P., Bechtold, P., Beljaars, A. C. M., van de Berg, L., Bidlot, J., Bormann, N., Delsol, C., Dragani, R., Fuentes, M., Geer, A. J., Haimberger, L., Healy, S. B., Hersbach, H., Hólm, E. V., Isaksen, I., Kållberg, P., Köhler, M., Matricardi, M., McNally, A. P., Monge-Sanz, B. M., Morcrette, J.-J., Park, B.-K., Peubey, C., de Rosnay, P., Tavolato, C., Thépaut, J.-N., and Vitart, F.: The ERA-Interim reanalysis: configuration and performance of the data assimilation system, *Q J R Meteorol Soc.*, 137, 553–597, <https://doi.org/10.1002/qj.828>, 2011.
- 840



- Delaygue, G., Bekki, S., and Bard, E.: Modelling the stratospheric budget of beryllium isotopes, *Tellus B: Chemical and Physical Meteorology*, 67, 28 582, <https://doi.org/10.3402/tellusb.v67.28582>, 2015.
- Dentener, F., Kinne, S., Bond, T., Boucher, O., Cofala, J., Generoso, S., Ginoux, P., Gong, S., Hoelzemann, J. J., Ito, A., Marelli, L., Penner, J. E., Putaud, J.-P., Textor, C., Schulz, M., van der Werf, G. R., and Wilson, J.: Emissions of primary aerosol and precursor gases in the years 2000 and 1750 prescribed data-sets for AeroCom, *Atmos. Chem. Phys.*, 6, 4321–4344, <https://doi.org/10.5194/acp-6-4321-2006>, 2006.
- 845 Deshler, T. and Kalnajs, L. E.: University of Wyoming stratospheric aerosol measurements | Mid latitudes [Dataset], <https://doi.org/10.15786/21534894>, 2022.
- Deshler, T., Luo, B., Kovilakam, M., Peter, T., and Kalnajs, L. E.: Retrieval of Aerosol Size Distributions From In Situ Particle Counter Measurements: Instrument Counting Efficiency and Comparisons With Satellite Measurements, *J. Geophys. Res.*, 124, 5058–5087, <https://doi.org/10.1029/2018JD029558>, 2019.
- 850 Dhomse, S. S., Emmerson, K. M., Mann, G. W., Bellouin, N., Carslaw, K. S., Chipperfield, M. P., Hommel, R., Abraham, N. L., Telford, P., Braesicke, P., Dalvi, M., Johnson, C. E., O'Connor, F., Morgenstern, O., Pyle, J. A., Deshler, T., Zawodny, J. M., and Thomason, L. W.: Aerosol microphysics simulations of the Mt. Pinatubo eruption with the UM-UKCA composition-climate model, *Atmos. Chem. Phys.*, 14, 11 221–11 246, <https://doi.org/10.5194/acp-14-11221-2014>, 2014.
- 855 Dhomse, S. S., Mann, G. W., Antuna Marrero, J.-C., Shallcross, S. W., Chipperfield, M. P., Carslaw, K. S., Marshall, L., Abraham, N. L., and Johnson, C. E.: Evaluating the simulated radiative forcings, aerosol properties, and stratospheric warmings from the 1963 Mt Agung, 1982 El Chichón, and 1991 Mt Pinatubo volcanic aerosol clouds, *Atmos. Chem. Phys.*, 20, 11 221–11 246, <https://doi.org/10.5194/acp-20-13627-2020>, 2020.
- 860 Dietmüller, S., Eichinger, R., Garny, H., Birner, T., Boenisch, H., Pitari, G., Mancini, E., Visioni, D., Stenke, A., Revell, L., Rozanov, E., Plummer, D. A., Scinocca, J., Jöckel, P., Oman, L., Deushi, M., Kiyotaka, S., Kinnison, D. E., Garcia, R., Morgenstern, O., Zeng, G., Stone, K. A., and Schofield, R.: Quantifying the effect of mixing on the mean age of air in CCMVal-2 and CCM1 models, *Atmos. Chem. Phys.*, 18, 6699–6720, <https://doi.org/10.5194/acp-18-6699-2018>, 2018.
- Emmons, L. K., Walters, S., Hess, P. G., Lamarque, J.-F., Pfister, G. G., Fillmore, D., Granier, C., Guenther, A., Kinnison, D., Laepple, T., Orlando, J., Tie, X., Tyndall, G., Wiedinmyer, C., Baughcum, S. L., and Kloster, S.: Description and evaluation of the Model for Ozone and Related chemical Tracers, version 4 (MOZART-4), *Geosci. Model Dev.*, 3, 43–67, <https://doi.org/10.5194/gmd-3-43-2010>, 2010.
- 865 English, J. M., Toon, O. B., Mills, M. J., and Yu, F.: Microphysical simulations of new particle formation in the upper troposphere and lower stratosphere, *Atmos. Chem. Phys.*, 11, 9303–9322, <https://doi.org/10.5194/acp-11-9303-2011>, 2011.
- Eyring, V., Bony, S., Meehl, G. A., Senior, C. A., Stevens, B., Stouffer, R. J., and Taylor, K. E.: Overview of the Coupled Model Intercomparison Project Phase 6 (CMIP6) experimental design and organization, *Geosci. Model Dev.*, 9, 1937–1958, <https://doi.org/10.5194/gmd-9-1937-2016>, 2016.
- 870 Feichter, J., Kjellström, E., Rodhe, H., Dentener, F., Lelieveld, J., and Roelofs, G.-J.: Simulation of the tropospheric sulfur cycle in a global climate model, *Atmos. Environ.*, 30, 1693–1707, [https://doi.org/10.1016/1352-2310\(95\)00394-0](https://doi.org/10.1016/1352-2310(95)00394-0), 1996.
- Feinberg, A., Sukhodolov, T., Luo, B.-P., Rozanov, E., Winkel, L. H., Peter, T., and Stenke, A.: Improved tropospheric and stratospheric sulfur cycle in the aerosol-chemistry-climate model SOCOL-AERv2, *Geosci. Model Dev.*, 12, 3863–3887, <https://doi.org/10.5194/gmd-12-3863-2019>, 2019.
- 875 Franke, H., Niemeier, U., and Visioni, D.: Differences in the quasi-biennial oscillation response to stratospheric aerosol modification depending on injection strategy and species, *Atmos. Chem. Phys.*, 21, 8615–8635, <https://doi.org/10.5194/acp-21-8615-2021>, 2021.



- Fuchs, N.: The Mechanics of Aerosols, Pergamon Press, Oxford, 1964.
- 880 Guttelman, A., Hoor, P., Pan, L. L., Randel, W. J., Hegglin, M. I., and Birner, T.: THE EXTRATROPICAL UPPER TROPOSPHERE AND LOWER STRATOSPHERE, *Reviews of Geophysics*, 49, <https://doi.org/https://doi.org/10.1029/2011RG000355>, 2011.
- Guttelman, A., Mills, M. J., Kinnison, D. E., Garcia, R. R., Smith, A. K., Marsh, D. R., Tilmes, S., Vitt, F., Bardeen, C. G., McInerney, J., Liu, H.-L., Solomon, S. C., Polvani, L. M., Emmons, L. K., Lamarque, J.-F., Richter, J. H., Glanville, A. S., Bacmeister, J. T., Phillips, A. S., Neale, R. B., Simpson, I. R., DuVivier, A. K., Hodzic, A., and Randel, W. J.: The Whole Atmosphere Community Climate Model Version 6 (WACCM6), *J. Geophys. Res.*, 124, 12 380–12 403, <https://doi.org/https://doi.org/10.1029/2019JD030943>, 2019.
- 885 Giorgetta, M. A., Manzini, E., Roeckner, E., Esch, M., and Bengtsson, L.: Climatology and Forcing of the Quasi-Biennial Oscillation in the MAECHAM5 Model, *J. Clim.*, 19, 3882–3901, <https://doi.org/10.1175/JCLI3830.1>, 2006.
- Granier, C., Bessagnet, B., Bond, T., D’Angiola, A., van der Gon, H. D., Frost, G. J., Heil, A., Kaiser, J. W., Kinne, S., Klimont, Z., Kloster, S., Lamarque, J.-F., Liousse, C., Masui, T., Meleux, F., Mieville, A., Ohara, T., Raut, J.-C., Riahi, K., Schultz, M. G., Smith, S. J., Thompson, A., van Aardenne, J., van der Werf, G. R., and van Vuuren, D. P.: Evolution of anthropogenic and biomass burning emissions of air pollutants at global and regional scales during the 1980-2010 period, *Clim. Change*, 109, 163–190, <https://doi.org/10.1007/s10584-011-0154-1>, 2011.
- 890 Günther, A., Höpfner, M., Sinnhuber, B.-M., Griessbach, S., Deshler, T., von Clarmann, T., and Stiller, G.: MIPAS observations of volcanic sulfate aerosol and sulfur dioxide in the stratosphere, *Atmos. Chem. Phys.*, 18, 1217–1239, <https://doi.org/10.5194/acp-18-1217-2018>, 2018.
- 895 Holton, J. R., Haynes, P. H., McIntyre, M. E., Douglass, A. R., Rood, R. B., and Pfister, L.: Stratosphere-troposphere exchange, *Rev. Geophys.*, 33, 403–439, <https://doi.org/10.1029/95RG02097>, 1995.
- Hommel, R., Timmreck, C., and Graf, H. F.: The global middle-atmosphere aerosol model MAECHAM5-SAM2: comparison with satellite and in-situ observations, *Geoscientific Model Development*, 4, 809–834, <https://doi.org/10.5194/gmd-4-809-2011>, 2011.
- 900 Hommel, R., Timmreck, C., Giorgetta, M. A., and Graf, H.: Quasi-biennial oscillation of the tropical stratospheric aerosol layer, *Atmos. Chem. Phys.*, 15, 5557–5584, <https://doi.org/10.5194/acp-15-5557-2015>, 2015.
- Höpfner, M., Boone, C. D., Funke, B., Glatthor, N., Grabowski, U., Günther, A., Kellmann, S., Kiefer, M., Linden, A., Lossow, S., Pumphrey, H. C., Read, W. G., Roiger, A., Stiller, G., Schlager, H., von Clarmann, T., and Wissmüller, K.: Sulfur dioxide (SO<sub>2</sub>) from MIPAS in the upper troposphere and lower stratosphere 2002–2012, *Atmos. Chem. Phys.*, 15, 7017–7037, <https://doi.org/10.5194/acp-15-7017-2015>, 2015.
- 905 Jacobson, M. Z.: Numerical Techniques to Solve Condensational and Dissolutional Growth Equations When Growth is Coupled to Reversible Reactions, *Aerosol Sci. Technol.*, 27, 491–498, 1997.
- Jacobson, M. Z. and Seinfeld, J. H.: Evolution of nanoparticle size and mixing state near the point of emission, *Atmos. Environ.*, 38, 1839–1850, <https://doi.org/10.1016/j.atmosenv.2004.01.014>, 2004.
- 910 Junge, C., Chagnon, C. W., and Manson, J. E.: Stratospheric Aerosols, *J. Meteorol.*, 18, 81–108, 1961.
- Karpechko, A. Y., Afargan-Gerstman, H., Butler, A. H., Domeisen, D. I. V., Kretschmer, M., Lawrence, Z., Manzini, E., Sigmond, M., Simpson, I. R., and Wu, Z.: Northern Hemisphere Stratosphere-Troposphere Circulation Change in CMIP6 Models: 1. Inter-Model Spread and Scenario Sensitivity, *J. Geophys. Res.*, 127, e2022JD036 992, <https://doi.org/10.1029/2022JD036992>, 2022.
- Kasten, F.: Falling speed of aerosol particles, *J. Appl. Meteorol.*, 7, 944–947, 1968.



- 915 Kerkweg, A., Buchholz, J., Ganzeveld, L., Pozzer, A., Tost, H., and Jöckel, P.: Technical Note: An implementation of the dry removal processes DRY DEPosition and SEDImentation in the Modular Earth Submodel System (MESSy), *Atmos. Chem. Phys.*, 6, 4617–4632, <https://doi.org/10.5194/acp-6-4617-2006>, 2006.
- Khalil, M. and Rasmussen, R.: Global sources, lifetimes and mass balances of carbonyl sulfide (OCS) and carbon disulfide (CS<sub>2</sub>) in the earth's atmosphere, *Atmos. Environ.* (1967), 18, 1805–1813, [https://doi.org/10.1016/0004-6981\(84\)90356-1](https://doi.org/10.1016/0004-6981(84)90356-1), 1984.
- 920 Kloster, S., Feichter, J., Maier-Reimer, E., Six, K. D., Stier, P., and Wetzel, P.: DMS cycle in the marine ocean-atmosphere system – a global model study, *Biogeosciences*, 3, 29–51, <https://doi.org/10.5194/bg-3-29-2006>, 2006.
- Kokkola, H., Kühn, T., Laakso, A., Bergman, T., Lehtinen, K. E. J., Mielonen, T., Arola, A., Stadtler, S., Korhonen, H., Ferrachat, S., Lohmann, U., Neubauer, D., Tegen, I., Siegenthaler-Le Drian, C., Schultz, M. G., Bey, I., Stier, P., Daskalakis, N., Heald, C. L., and Romakkaniemi, S.: SALSA2.0: The sectional aerosol module of the aerosol–chemistry–climate model ECHAM6.3.0-HAM2.3-MOZ1.0, *Geosci. Model Dev.*, 11, 3833–3863, <https://doi.org/10.5194/gmd-11-3833-2018>, 2018.
- 925 Kovilakam, M. and Deshler, T.: On the accuracy of stratospheric aerosol extinction derived from in situ size distribution measurements and surface area density derived from remote SAGE II and HALOE extinction measurements, *J. Geophys. Res.*, 120, 8426–8447, <https://doi.org/10.1002/2015JD023303>, 2015.
- Kovilakam, M., Thomason, L. W., Ernest, N., Rieger, L., Bourassa, A., and Millán, L.: The Global Space-based Stratospheric Aerosol Climatology (version 2.0): 1979–2018, *Earth. Syst. Sci. Data*, 12, 2607–2634, <https://doi.org/10.5194/essd-12-2607-2020>, 2020.
- 930 Kovilakam, M., Thomason, L., and Knepp, T.: SAGE III/ISS aerosol/cloud categorization and its impact on GloSSAC, *Atmos. Meas. Tech. Discussions*, 2022, 1–33, <https://doi.org/10.5194/amt-2022-222>, 2022.
- Kremser, S., Thomason, L. W., von Hobe, M., Hermann, M., Deshler, T., Timmreck, C., Toohey, M., Stenke, A., Schwarz, J. P., Weigel, R., Fueglistaler, S., Prata, F. J., Vernier, J.-P., Schlager, H., Barnes, J. E., Antuña-Marrero, J.-C., Fairlie, D., Palm, M., Mahieu, E., Notholt, J., Rex, M., Bingen, C., Vanhellemont, F., Bourassa, A., Plane, J. M. C., Klocke, D., Carn, S. A., Clarisse, L., Trickl, T., Neely, R., James, A. D., Rieger, L., Wilson, J. C., and Meland, B.: Stratospheric aerosol-Observations, processes, and impact on climate, *Rev. Geophys.*, 54, 278–335, <https://doi.org/10.1002/2015RG000511>, 2016.
- 935 Kulmala, M. and Laaksonen, A.: Binary nucleation of water-sulfuric acid system: Comparison of classical theories with different H<sub>2</sub>SO<sub>4</sub> saturation vapor pressures, *J. Chem. Phys.*, 93, 696–701, <https://doi.org/10.1063/1.459519>, 1990.
- 940 Laakso, A., Niemeier, U., Visioni, D., Tilmes, S., and Kokkola, H.: Dependency of the impacts of geoengineering on the stratospheric sulfur injection strategy – Part 1: Intercomparison of modal and sectional aerosol modules, *Atmos. Chem. Phys.*, 22, 93–118, <https://doi.org/10.5194/acp-22-93-2022>, 2022.
- Lamarque, J.-F., Dentener, F., McConnell, J., Ro, C.-U., Shaw, M., Vet, R., Bergmann, D., Cameron-Smith, P., Dalsoren, S., Doherty, R., Faluvegi, G., Ghan, S. J., Josse, B., Lee, Y. H., MacKenzie, I. A., Plummer, D., Shindell, D. T., Skeie, R. B., Stevenson, D. S., Strode, S., Zeng, G., Curran, M., Dahl-Jensen, D., Das, S., Fritzsche, D., and Nolan, M.: Multi-model mean nitrogen and sulfur deposition from the Atmospheric Chemistry and Climate Model Intercomparison Project (ACCMIP): evaluation of historical and projected future changes, *Atmospheric Chemistry and Physics*, 13, 7997–8018, <https://doi.org/10.5194/acp-13-7997-2013>, 2013.
- 945 Lana, A., Bell, T. G., Simó, R., Vallina, S. M., Ballabrera-Poy, J., Kettle, A. J., Dachs, J., Bopp, L., Saltzman, E. S., Stefels, J., Johnson, J. E., and Liss, P. S.: An updated climatology of surface dimethylsulfide concentrations and emission fluxes in the global ocean, *Global Biogeochem. Cycles*, 25, <https://doi.org/10.1029/2010gb003850>, 2011.
- 950





- Lee, C., Martin, R. V., van Donkelaar, A., Lee, H., Dickerson, R. R., Hains, J. C., Krotkov, N., Richter, A., Vinnikov, K., and Schwab, J. J.: SO<sub>2</sub> emissions and lifetimes: Estimates from inverse modeling using in situ and global, space-based (SCIAMACHY and OMI) observations, *J. Geophys. Res.*, 116, <https://doi.org/10.1029/2010JD014758>, 2011.
- Lehtinen, K. E. J., Rannik, Ü., Petäjä, T., Kulmala, M., and Hari, P.: Nucleation rate and vapor concentration estimations using a least squares aerosol dynamics method, *J. Geophys. Res.*, 109, <https://doi.org/10.1029/2004JD004893>, 2004.
- 955 Liu, X., Easter, R. C., Ghan, S. J., Zaveri, R., Rasch, P., Shi, X., Lamarque, J.-F., Gettelman, A., Morrison, H., Vitt, F., Conley, A., Park, S., Neale, R., Hannay, C., Ekman, A. M. L., Hess, P., Mahowald, N., Collins, W., Iacono, M. J., Bretherton, C. S., Flanner, M. G., and Mitchell, D.: Toward a minimal representation of aerosols in climate models: description and evaluation in the Community Atmosphere Model CAM5, *Geosci. Model Dev.*, 5, 709–739, <https://doi.org/10.5194/gmd-5-709-2012>, 2012.
- 960 Liu, X., Ma, P.-L., Wang, H., Tilmes, S., Singh, B., Easter, R. C., Ghan, S. J., and Rasch, P. J.: Description and evaluation of a new four-mode version of the Modal Aerosol Module (MAM4) within version 5.3 of the Community Atmosphere Model, *Geosci. Model Dev.*, 9, 505–522, <https://doi.org/10.5194/gmd-9-505-2016>, 2016.
- Marshall, L., Schmidt, A., Toohey, M., Carslaw, K. S., Mann, G. W., Sigl, M., Khodri, M., Timmreck, C., Zanchettin, D., Ball, W. T., Bekki, S., Brooke, J. S. A., Dhomse, S., Johnson, C., Lamarque, J.-F., LeGrande, A. N., Mills, M. J., Niemeier, U., Pope, J. O., Poulain, V., 965 Robock, A., Rozanov, E., Stenke, A., Sukhodolov, T., Tilmes, S., Tsigaridis, K., and Tummon, F.: Multi-model comparison of the volcanic sulfate deposition from the 1815 eruption of Mt. Tambora, *Atmos. Chem. Phys.*, 18, 2307–2328, <https://doi.org/10.5194/acp-18-2307-2018>, 2018.
- Marshall, L., Johnson, J. S., Mann, G. W., Lee, L., Dhomse, S. S., Regayre, L., Yoshioka, M., Carslaw, K. S., and Schmidt, A.: Exploring How Eruption Source Parameters Affect Volcanic Radiative Forcing Using Statistical Emulation, *J. Geophys. Res.*, 124, 964–985, 970 <https://doi.org/10.1029/2018JD028675>, 2019.
- Marshall, L., Schmidt, A., Johnson, J. S., Mann, G. W., Lee, L., Rigby, R., and Carslaw, K. S.: Unknown Eruption Source Parameters Cause Large Uncertainty in Historical Volcanic Radiative Forcing Reconstructions, *J. Geophys. Res.*, <https://doi.org/10.1029/2020JD033578>, 2021.
- Masson-Delmotte, V., Zhai, P., Pirani, A., Connors, S., Péan, C., Berger, S., Caud, N., Chen, Y., Goldfarb, L., Gomis, M., Huang, M., Leitzell, 975 K., Lonnoy, E., Matthews, J., Maycock, T., Waterfield, T., Yelekçi, O., Yu, R., and Zhou, B., eds.: Summary for Policymakers, p. 3-32, Cambridge University Press, Cambridge, United Kingdom and New York, NY, USA, <https://doi.org/10.1017/9781009157896.001>, 2021.
- Mills, M. J., Schmidt, A., Easter, R., Solomon, S., Kinnison, D. E., Ghan, S. J., Neely III, R. R., Marsh, D. R., Conley, A., Bardeen, C. G., and Gettelman, A.: Global volcanic aerosol properties derived from emissions, 1990–2014, using CESM1(WACCM), *J. Geophys. Res.*, 121, 2332–2348, <https://doi.org/10.1002/2015JD024290>, 2016.
- 980 Montzka, S. A., Calvert, P., Hall, B. D., Elkins, J. W., Conway, T. J., Tans, P. P., and Sweeney, C.: On the global distribution, seasonality, and budget of atmospheric carbonyl sulfide (COS) and some similarities to CO<sub>2</sub>, *J. Geophys. Res.*, 112, <https://doi.org/10.1029/2006JD007665>, 2007.
- Müller, J.-F. and Brasseur, G.: IMAGES: A three-dimensional chemical transport model of the global troposphere, *J. Geophys. Res.*, 100, 16 445, <https://doi.org/10.1029/94JD03254>, 1995.
- 985 NASA/LARC/SD/ASDC: Stratospheric Aerosol and Gas Experiment (SAGE) II Version 7.0 Aerosol, O<sub>3</sub>, NO<sub>2</sub> and H<sub>2</sub>O Profiles in binary format, [https://doi.org/10.5067/ERBS/SAGEII/SOLAR\\_BINARY\\_L2-V7.0](https://doi.org/10.5067/ERBS/SAGEII/SOLAR_BINARY_L2-V7.0), 2012.
- NASA/LARC/SD/ASDC: Global Space-based Stratospheric Aerosol Climatology Version 2.2, <https://doi.org/10.5067/GLOSSAC-L3-V2.2>, 2022.



- Niemeier, U. and Timmreck, C.: What is the limit of climate engineering by stratospheric injection of SO<sub>2</sub>?, *Atmos. Chem. Phys.*, 15, 9129–9141, 2015.
- 990 Niemeier, U., Timmreck, C., Graf, H.-F., Kinne, S., Rast, S., and Self, S.: Initial fate of fine ash and sulfur from large volcanic eruptions, *Atmos. Chem. Phys.*, 9, 9043–9057, <https://doi.org/10.5194/acp-9-9043-2009>, 2009.
- Niemeier, U., Richter, J. H., and Tilmes, S.: Differing responses of the quasi-biennial oscillation to artificial SO<sub>2</sub> injections in two global models, *Atmos. Chem. Phys.*, 20, 8975–8987, <https://doi.org/10.5194/acp-20-8975-2020>, 2020.
- 995 Pitari, G., Mancini, E., Rizi, V., and Shindell, D. T.: Impact of Future Climate and Emission Changes on Stratospheric Aerosols and Ozone, *J. Atmos. Sci.*, 59, 414–440, [https://doi.org/10.1175/1520-0469\(2002\)059<0414:IOFCAE>2.0.CO;2](https://doi.org/10.1175/1520-0469(2002)059<0414:IOFCAE>2.0.CO;2), 2002.
- Pitari, G., Di Genova, G., Mancini, E., Visioni, D., Gandolfi, I., and Cionni, I.: Stratospheric Aerosols from Major Volcanic Eruptions: A Composition–Climate Model Study of the Aerosol Cloud Dispersal and e-folding Time, *Atmosphere*, 7, 75, <https://doi.org/10.3390/atmos7060075>, 2016.
- 1000 Plumb, R. A. and Eluszkiewicz, J.: The Brewer–Dobson Circulation: Dynamics of the Tropical Upwelling, *J. Atmos. Sci.*, 56, 868–890, [https://doi.org/10.1175/1520-0469\(1999\)056<0868:BD>2.0.CO;2](https://doi.org/10.1175/1520-0469(1999)056<0868:BD>2.0.CO;2), 1999.
- Pye, H. O. T., Chan, A. W. H., Barkley, M. P., and Seinfeld, J. H.: Global modeling of organic aerosol: the importance of reactive nitrogen (NO<sub>x</sub> and NO<sub>3</sub>), *Atmos. Chem. Phys.*, 10, 11 261–11 276, <https://doi.org/10.5194/acp-10-11261-2010>, 2010.
- Quaglia, I., Timmreck, C., Niemeier, U., Visioni, D., Pitari, G., Brodowsky, C., Brühl, C., Dhomse, S. S., Franke, H., Laakso, A., Mann, G. W., Rozanov, E., and Sukhodolov, T.: Interactive stratospheric aerosol models’ response to different amounts and altitudes of SO<sub>2</sub> injection during the 1991 Pinatubo eruption, *Atmos. Chem. Phys.*, 23, 921–948, <https://doi.org/10.5194/acp-23-921-2023>, 2023.
- 1005 Rao, J. and Garfinkel, C. I.: Projected changes of stratospheric final warmings in the Northern and Southern Hemispheres by CMIP5/6 models, *Clim. Dyn.*, 56, 3353–3371, <https://doi.org/10.1007/s00382-021-05647-6>, 2021.
- Rayner, N. A., Parker, D. E., Horton, E. B., Folland, C. K., Alexander, L. V., Rowell, D. P., Kent, E. C., and Kaplan, A.: Global analyses of sea surface temperature, sea ice, and night marine air temperature since the late nineteenth century, *J. Geophys. Res.*, 108, <https://doi.org/10.1029/2002jd002670>, 2003.
- 1010 Revell, L. E., Stenke, A., Luo, B., Kremser, S., Rozanov, E., Sukhodolov, T., and Peter, T.: Impacts of Mt Pinatubo volcanic aerosol on the tropical stratosphere in chemistry–climate model simulations using CCM1 and CMIP6 stratospheric aerosol data, *Atmos. Chem. Phys.*, 17, 13 139–13 150, <https://doi.org/10.5194/acp-17-13139-2017>, 2017.
- 1015 Robock, A.: 20 Reasons Why Geoengineering May Be a Bad Idea, *Bulletin of the Atomic Scientists*, 64, 14–18, <https://doi.org/10.2968/064002006>, 2008.
- Schmidt, A., Mills, M. J., Ghan, S., Gregory, J. M., Allan, R. P., Andrews, T., Bardeen, C. G., Conley, A., Forster, P. M., Gettelman, A., Portmann, R. W., Solomon, S., and Toon, O. B.: Volcanic Radiative Forcing From 1979 to 2015, *J. Geophys. Res.*, 123, 12 491–12 508, <https://doi.org/10.1029/2018JD028776>, 2018.
- 1020 Schoberl, M. R. and Hartmann, D. L.: The Dynamics of the Stratospheric Polar Vortex and Its Relation to Springtime Ozone Depletions, *Science*, 251, 46–52, <https://doi.org/10.1126/science.251.4989.46>, 1991.
- Sekiya, T., Sudo, K., and Nagai, T.: Evolution of stratospheric sulfate aerosol from the 1991 Pinatubo eruption: Roles of aerosol microphysical processes, *J. Geophys. Res.*, 121, 2911–2938, <https://doi.org/10.1002/2015JD024313>, 2016.
- Sheng, J.-X., Weisenstein, D. K., Luo, B.-P., Rozanov, E., Stenke, A., Anet, J., Bingemer, H., and Peter, T.: Global atmospheric sulfur budget under volcanically quiescent conditions: Aerosol–chemistry–climate model predictions and validation, *J. Geophys. Res.*, 120, 256–276, <https://doi.org/10.1002/2014JD021985>, 2015.
- 1025



- Smith, S. J., van Aardenne, J., Klimont, Z., Andres, R. J., Volke, A., and Delgado Arias, S.: Anthropogenic sulfur dioxide emissions: 1850–2005, *Atmos. Chem. Phys.*, 11, 1101–1116, <https://doi.org/10.5194/acp-11-1101-2011>, 2011.
- SPARC: Assessment of Stratospheric Aerosol Properties (ASAP), Tech. rep., Stratosphere-troposphere Processes and their Role in Climate (SPARC), <http://www.sparc-climate.org/publications/sparc-reports/>, 2006.
- 1030 Stenke, A., Schraner, M., Rozanov, E., Egorova, T., Luo, B., and Peter, T.: The SOCOL version 3.0 chemistry-climate model: Description, evaluation, and implications from an advanced transport algorithm, *Geosci. Model Dev.*, 6, 1407–1427, <https://doi.org/10.5194/gmd-6-1407-2013>, 2013.
- Stevens, B., Giorgetta, M., Esch, M., Mauritsen, T., Crueger, T., Rast, S., Salzmann, M., Schmidt, H., Bader, J., Block, K., Brokopf, R., 1035 Fast, I., Kinne, S., Kornblueh, L., Lohmann, U., Pincus, R., Reichler, T., and Roeckner, E.: Atmospheric component of the MPI-M Earth System Model: ECHAM6, *J. Adv. Model. Earth Syst.*, 5, 146–172, <https://doi.org/10.1002/jame.20015>, 2013.
- Stier, P., Feichter, J., Kinne, S., Kloster, S., Vignati, E., Wilson, J., Ganzeveld, L., Tegen, I., Werner, M., Balkanski, Y., Schulz, M., Boucher, O., Minikin, A., and Petzold, A.: The aerosol-climate model ECHAM5-HAM, *Atmos. Chem. Phys.*, 5, 1125–1156, <https://doi.org/10.5194/acp-5-1125-2005>, 2005.
- 1040 Sudo, K. and Akimoto, H.: Global source attribution of tropospheric ozone: Long-range transport from various source regions, *J. Geophys. Res.*, 112, <https://doi.org/10.1029/2006JD007992>, 2007.
- Sudo, K., Takahashi, M., Kurokawa, J.-i., and Akimoto, H.: CHASER: A global chemical model of the troposphere 1. Model description, *J. Geophys. Res.*, 107, ACH 7–1–ACH 7–20, <https://doi.org/10.1029/2001JD001113>, 2002.
- Tabazadeh, A., Toon, O. B., Clegg, S. L., and Hamill, P.: A new parameterization of H<sub>2</sub>SO<sub>4</sub>/H<sub>2</sub>O aerosol composition: Atmospheric impli- 1045 cations, *Geophys. Res. Lett.*, 24, 1931–1934, <https://doi.org/10.1029/97GL01879>, 1997.
- Takahashi, H., Luo, Z. J., Stephens, G., and Mulholland, J. P.: Revisiting the Land-Ocean Contrasts in Deep Convective Cloud Intensity Using Global Satellite Observations, *Geophys. Res. Lett.*, 50, e2022GL102089, <https://doi.org/10.1029/2022GL102089>, 2023.
- Tapiador, F., Navarro, A., Levizzani, V., García-Ortega, E., Huffman, G., Kidd, C., Kucera, P., Kummerow, C., Masunaga, H., Petersen, W., Roca, R., Sánchez, J.-L., Tao, W.-K., and Turk, F.: Global precipitation measurements for validating climate models, *Atmospheric 1050 Research*, 197, 1–20, <https://doi.org/10.1016/j.atmosres.2017.06.021>, 2017.
- Tegen, I., Neubauer, D., Ferrachat, S., Siegenthaler-Le Drian, C., Bey, I., Schutgens, N., Stier, P., Watson-Parris, D., Stanelle, T., Schmidt, H., Rast, S., Kokkola, H., Schultz, M., Schroeder, S., Daskalakis, N., Barthel, S., Heinold, B., and Lohmann, U.: The global aerosol–climate model ECHAM6.3–HAM2.3 – Part 1: Aerosol evaluation, *Geosci. Model Dev.*, 12, 1643–1677, <https://doi.org/10.5194/gmd-12-1643-2019>, 2019.
- 1055 Textor, C., Schulz, M., Guibert, S., Kinne, S., Balkanski, Y., Bauer, S., Berntsen, T., Berglen, T., Boucher, O., Chin, M., Dentener, F., Diehl, T., Easter, R., Feichter, H., Fillmore, D., Ghan, S., Ginoux, P., Gong, S., Grini, A., Hendricks, J., Horowitz, L., Huang, P., Isaksen, I., Iversen, I., Kloster, S., Koch, D., Kirkevåg, A., Kristjánsson, J. E., Krol, M., Lauer, A., Lamarque, J. F., Liu, X., Montanaro, V., Myhre, G., Penner, J., Pitari, G., Reddy, S., Seland, Ø., Stier, P., Takemura, T., and Tie, X.: Analysis and quantification of the diversities of aerosol life cycles within AeroCom, *Atmos. Chem. Phys.*, 6, 1777–1813, <https://doi.org/10.5194/acp-6-1777-2006>, 2006.
- 1060 Thomason, L. W., Ernest, N., Millán, L., Rieger, L., Bourassa, A., Vernier, J. P., Manney, G., Luo, B., Arfeuille, F., and Peter, T.: A global space-based stratospheric aerosol climatology: 1979–2016, *Earth Syst. Sci. Data*, 10, 469–492, <https://doi.org/10.5194/essd-10-469-2018>, 2018.



- Tilmes, S., Mills, M. J., Zhu, Y., Bardeen, C. G., Vitt, F., Yu, P., Fillmore, D., Liu, X., Toon, B., and Deshler, T.: Description and performance of the CARMA sectional aerosol microphysical model in CESM2, *Geosci. Model Dev. Discussions*, p. 1–58, <https://doi.org/10.5194/gmd-2023-79>, 2023.
- 1065
- Timmreck, C.: Three-dimensional simulation of stratospheric background aerosol: First results of a multiannual general circulation model simulation, *J. Geophys. Res.*, 106, 28 313–28 332, 2001.
- Timmreck, C., Mann, G. W., Aquila, V., Hommel, R., Lee, L. A., Schmidt, A., Brühl, C., Carn, S., Chin, M., Dhomse, S. S., Diehl, T., English, J. M., Mills, M. J., Neely, R., Sheng, J., Toohey, M., and Weisenstein, D.: The Interactive Stratospheric Aerosol Model Intercomparison Project (ISA-MIP): motivation and experimental design, *Geosci. Model Dev.*, 11, 2581–2608, <https://doi.org/10.5194/gmd-11-2581-2018>, 2018.
- 1070
- Toon, O. B., Turco, R. P., Westphal, D., Malone, R., and Liu, M.: A Multidimensional Model for Aerosols: Description of Computational Analogs, *J. Atmos. Sci.*, 45, 2123–2144, [https://doi.org/10.1175/1520-0469\(1988\)045<2123:AMMFAD>2.0.CO;2](https://doi.org/10.1175/1520-0469(1988)045<2123:AMMFAD>2.0.CO;2), 1988.
- Tost, H., Jöckel, P., Kerkweg, A., Sander, R., and Lelieveld, J.: Technical note: A new comprehensive SCAVenging submodel for global atmospheric chemistry modelling, *Atmos. Chem. Phys.*, 6, 565–574, <https://doi.org/10.5194/acp-6-565-2006>, 2006.
- 1075
- Turco, R. P., Hamill, P., Toon, O. B., Whitten, R. C., and Kiang, C. S.: A One-Dimensional Model Describing Aerosol Formation and Evolution in the Stratosphere: I. Physical Processes and Mathematical Analogs, *J. Atmos. Sci.*, 36, 699–717, [https://doi.org/10.1175/1520-0469\(1979\)0362.0.CO;2](https://doi.org/10.1175/1520-0469(1979)0362.0.CO;2), 1979.
- Vehkamäki, H., Kulmala, M., Napari, I., Lehtinen, K. E. J., Timmreck, C., Noppel, M., and Laaksonen, A.: An improved parameterization for sulfuric acid–water nucleation rates for tropospheric and stratospheric conditions, *J. Geophys. Res.*, 107, AAC 3–1–AAC 3–10, <https://doi.org/10.1029/2002JD002184>, 2002.
- 1080
- Vernier, J.-P., Thomason, L. W., Pommereau, J.-P., Bourassa, A., Pelon, J., Garnier, A., Hauchecorne, A., Blanot, L., Trepte, C., Degenstein, D., and Vargas, F.: Major influence of tropical volcanic eruptions on the stratospheric aerosol layer during the last decade, *Geophys. Res. Lett.*, 38, <https://doi.org/https://doi.org/10.1029/2011GL047563>, 2011.
- 1085
- Vignati, E., Wilson, J., and Stier, P.: M7: An efficient size-resolved aerosol microphysics module for large-scale aerosol transport models, *J. Geophys. Res.*, 109, 2004.
- Visioni, D., Pitari, G., di Genova, G., Tilmes, S., and Cionni, I.: Upper tropospheric ice sensitivity to sulfate geoengineering, *Atmos. Chem. Phys.*, 18, 14 867–14 887, <https://doi.org/10.5194/acp-18-14867-2018>, 2018a.
- Visioni, D., Pitari, G., Tuccella, P., and Curci, G.: Sulfur deposition changes under sulfate geoengineering conditions: quasi-biennial oscillation effects on the transport and lifetime of stratospheric aerosols, *Atmos. Chem. Phys.*, 18, 2787–2808, <https://doi.org/10.5194/acp-18-2787-2018>, 2018b.
- 1090
- Walcek, C. J.: Minor flux adjustment near mixing ratio extremes for simplified yet highly accurate monotonic calculation of tracer advection, *J. Geophys. Res.*, 105, 9335–9348, <https://doi.org/10.1029/1999JD901142>, 2000.
- Walters, D. N., Williams, K. D., Boutle, I. A., Bushell, A. C., Edwards, J. M., Field, P. R., Lock, A. P., Morcrette, C. J., Stratton, R. A., Wilkinson, J. M., and Others: The Met Office Unified Model global atmosphere 4.0 and JULES global land 4.0 configurations, *Geosci. Model Dev.*, 7, 361–386, 2014.
- 1095
- Watanabe, S., Hajima, T., Sudo, K., Nagashima, T., Takemura, T., Okajima, H., Nozawa, T., Kawase, H., Abe, M., Yokohata, T., Ise, T., Sato, H., Kato, E., Takata, K., Emori, S., and Kawamiya, M.: MIROC-ESM 2010: model description and basic results of CMIP5-20c3m experiments, *Geosci. Model Dev.*, 4, 845–872, <https://doi.org/10.5194/gmd-4-845-2011>, 2011.



- 1100 Webb, M. J., Andrews, T., Bodas-Salcedo, A., Bony, S., Bretherton, C. S., Chadwick, R., Chepfer, H., Douville, H., Good, P., Kay, J. E., Klein, S. A., Marchand, R., Medeiros, B., Siebesma, A. P., Skinner, C. B., Stevens, B., Tselioudis, G., Tsushima, Y., and Watanabe, M.: The Cloud Feedback Model Intercomparison Project (CFMIP) contribution to CMIP6, *Geoscientific Model Development*, 10, 359–384, <https://doi.org/10.5194/gmd-10-359-2017>, 2017.
- Weisenstein, D. K., Yue, G. K., Ko, M. K. W., Sze, N.-D., Rodriguez, J. M., and Scott, C. J.: A two-dimensional model of sulfur species and aerosols, *J. Geophys. Res.*, 102, 13 019–13 035, <https://doi.org/10.1029/97JD00901>, 1997.
- 1105 Weisenstein, D. K., Vioni, D., Franke, H., Niemeier, U., Vattioni, S., Chiodo, G., Peter, T., and Keith, D. W.: An interactive stratospheric aerosol model intercomparison of solar geoengineering by stratospheric injection of SO<sub>2</sub> or accumulation-mode sulfuric acid aerosols, *Atmos. Chem. Phys.*, 22, 2955–2973, <https://doi.org/10.5194/acp-22-2955-2022>, 2022.
- Woodward, S.: Modeling the atmospheric life cycle and radiative impact of mineral dust in the Hadley Centre climate model, *J. Geophys. Res.*, <https://doi.org/10.1029/2000JD900795>, 2001.
- 1110 Woodward, S.: Hadley Centre Technical Note 87: Mineral Dust in HadGEM2, UK Met Office, Exeter, UK, [https://sds-was.aemet.es/forecast-products/dust-forecasts/Woodward\\_2011\\_HadGEM2.pdf](https://sds-was.aemet.es/forecast-products/dust-forecasts/Woodward_2011_HadGEM2.pdf), 2011.
- Wrana, F., Niemeier, U., Thomason, L. W., Wallis, S., and von Savigny, C.: Stratospheric aerosol size reduction after volcanic eruptions, *EGUsphere*, 2023, 1–30, <https://doi.org/10.5194/egusphere-2023-837>, 2023.
- 1115 Yu, F., Luo, G., Nair, A. A., Eastham, S., Williamson, C. J., Kupc, A., and Brock, C. A.: Particle number concentrations and size distributions in the stratosphere: implications of nucleation mechanisms and particle microphysics, *Atmos. Chem. Phys.*, 23, 1863–1877, <https://doi.org/10.5194/acp-23-1863-2023>, 2023.
- Yu, P., Toon, O. B., Bardeen, C. G., Mills, M. J., Fan, T., English, J. M., and Neely, R. R.: Evaluations of tropospheric aerosol properties simulated by the community earth system model with a sectional aerosol microphysics scheme, *J. Adv. Model. Earth Syst.*, 7, 865–914, <https://doi.org/10.1002/2014MS000421>, 2015.
- 1120 Yu, P., Rosenlof, K. H., and Liu, S.: Efficient transport of tropospheric aerosol into the stratosphere via the Asian summer monsoon anticyclone, *PNAS*, <https://doi.org/10.1073/pnas.1701170114>, 2017.
- Zanchettin, D., Khodri, M., Timmreck, C., Toohey, M., Schmidt, A., Gerber, E. P., Hegerl, G., Robock, A., Pausata, F. S., Ball, W. T., Bauer, S. E., Bekki, S., Dhomse, S. S., LeGrande, A. N., Mann, G. W., Marshall, L., Mills, M., Marchand, M., Niemeier, U., Poulain, V., Rozanov, E., Rubino, A., Stenke, A., Tsigaridis, K., and Tummon, F.: The Model Intercomparison Project on the climatic response to Volcanic forcing (VolMIP): Experimental design and forcing input data for CMIP6, *Geosci. Model Dev.*, 9, 2701–2719, <https://doi.org/10.5194/gmd-9-2701-2016>, 2016.
- 1125 Zhang, K., O'Donnell, D., Kazil, J., Stier, P., Kinne, S., Lohmann, U., Ferrachat, S., Croft, B., Quaas, J., Wan, H., Rast, S., and Feichter, J.: The global aerosol-climate model ECHAM-HAM, version 2: sensitivity to improvements in process representations, *Atmos. Chem. Phys.*, 12, 8911–8949, <https://doi.org/10.5194/acp-12-8911-2012>, 2012.
- 1130
